# Supplementary material for: Effects of tolvaptan add-on therapy in patients with acute heart failure: meta-analysis on randomised controlled trials
Source: PubMed Central journal article supplement — BMJ Open. 2019 May 1;9(4):e025537. doi: 10.1136/bmjopen-2018-025537 (PMC6501975; doi:10.1136/bmjopen-2018-025537), 2019-05-01
Supplement: bmjopen-2018-025537.draft_revisions.pdf [file bmjopen-2018-025537.draft_revisions.pdf]

# BMJ Open

BMJ Open is committed to open peer review. As part of this commitment we make the peer review history of every article we publish publicly available.

When an article is published we post the peer reviewers' comments and the authors' responses online. We also post the versions of the paper that were used during peer review. These are the versions that the peer review comments apply to.

The versions of the paper that follow are the versions that were submitted during the peer review process. They are not the versions of record or the final published versions. They should not be cited or distributed as the published version of this manuscript.

BMJ Open is an open access journal and the full, final, typeset and author-corrected version of record of the manuscript is available on our site with no access controls, subscription charges or pay-per-view fees (<http://bmjopen.bmj.com>).

If you have any questions on BMJ Open's open peer review process please email [info.bmjopen@bmj.com](mailto:info.bmjopen@bmj.com)

# BMJ Open

## Effects of Tolvaptan add-on therapy in patients with acute heart failure: meta analysis of randomized controlled trials

|                               |                                                                                                                         |
|-------------------------------|-------------------------------------------------------------------------------------------------------------------------|
| Journal:                      | <i>BMJ Open</i>                                                                                                         |
| Manuscript ID                 | bmjopen-2018-025537                                                                                                     |
| Article Type:                 | Research                                                                                                                |
| Date Submitted by the Author: | 03-Aug-2018                                                                                                             |
| Complete List of Authors:     | Ma, Guang; The First Affiliated Hospital of Henan University;<br>Ma, Xixi<br>Wang, Guoliang<br>Teng, Wei<br>Hui, Xuezhi |
| Keywords:                     | tolvaptan, worsening renal function, acute decompensated heart failure, meta-analysis                                   |
|                               |                                                                                                                         |

SCHOLARONE™  
Manuscripts

Peer Review Only

1  
2  
3  
4 Effects of Tolvaptan add-on therapy in patients with acute heart failure: meta analysis of  
5 randomized controlled trials

6 Guang Ma, Xixi Ma, Guoliang Wang, Wei Teng, Xuezhi Hui, Guang Ma \*

8  
9 Department of Cardiology, The First Affiliated Hospital of Henan University, Kaifeng, Henan,  
10 China,

11 \* Correspondence: Guang Ma, Department of Cardiology, The First Affiliated Hospital of Henan  
12 University, Kaifeng, Henan, China,  
13 China (e-mail: maguang870407@163.com).  
14

#### 15 **Abstract**

16 Objectives: Treating acute decompensated heart failure (ADHF) is to improve congestion using  
17 diuretics, which may worsen renal function (WRF), but the clinical efficacy of tolvaptan add-on  
18 therapy on reducing WRF in ADHF patients is not consistent. The aim of this meta-analysis was to  
19 evaluate the effects of tolvaptan add-on therapy on reducing WRF in ADHF patients.  
20

21 **Methods:** We performed a meta-analysis of randomised trials of tolvaptan add-on therapy on  
22 reducing WRF in patients with ADHF (n=937 patients, in 7 trials). Two reviewers  
23 independently extracted data. Data on WRF, short-term all-cause mortality, body weight  
24 decreased, elevated sodium level were collected. We calculated pooled relative risk (RRs),  
25 weighted mean difference and associated 95% CIs. We used fixed-effects or random-effects  
26 models to assess the overall combined risk estimates according to  $I^2$  statistics. Heterogeneity was  
27 thought to be significant when  $I^2 > 50\%$ . All of the meta-analytic procedures were performed by  
28 using Review Manager software, version 5.3.  
29  
30

31 **Results:** Seven randomised controlled trials, with a total of 937 patients, were included for  
32 analysis. Compared with the control, tolvaptan add-on therapy did not improve incidence of  
33 worsening renal function [RR (95% confidence interval, CI) 0.78 (0.48 1.26) P=0.31] or short-term  
34 all-cause mortality [RR (95% CI) 0.85 (0.47 1.56), P=0.61]. However, tolvaptan add-on therapy  
35 reduced body weight in two days [SMD (95% CI) -0.49 (-0.64 -0.34), P<0.00001], elevated sodium  
36 level.  
37

38 **Conclusion:** Our result suggested that comparing with the standard diuretic therapy, Tolvaptan  
39 add-on therapy did not reduce the incidence of worsening renal function and short-term  
40 mortality, however, can decrease body weight and elevated sodium level in patients with acute  
41 heart failure. Due to the limitations of the quality and quantity of the articles, this conclusion still  
42 needs further research to confirm.  
43

44 Abbreviations: ADHF= acute decompensated heart failure, RCT= randomized controlled  
45 trial, WRF= worsening renal function, HF= heart failure, AVP= Arginine-vasopressin, CHF= chronic  
46 heart failure, RAA=renin-angiotensin-aldosterone  
47  
48

49 **Keywords:** tolvaptan, worsening renal function, acute decompensated heart failure,  
50 meta-analysis  
51  
52

#### 53 **Article Summary**

54 This manuscript evaluated the effects of tolvaptan add-on therapy in reducing the risk of  
55 worsening renal failure in comparison with the standard diuretic therapy. The argument seemed  
56  
57  
58  
59  
60

1  
2  
3 to be intriguing because the real meaning of WRF during diuretic therapy is under debate. This  
4 meta-analysis demonstrated that adding tolvaptan in acute HF patients treated with diuretic did  
5 not reduce renal function (but did not protect renal function).

### 6 **Strengths and limitations of this study**

7  
8 In this meta-analysis, we evaluated the worsening renal function of tolvaptan in patients  
9 with acute decompensated heart failure. We demonstrated that tolvaptan was not reduce the  
10 incidence of worsening renal function or short-term all-cause mortality. However, it decrease  
11 body weight and elevated sodium level .

12  
13 Several limitations of the present meta-analysis should be considered. First, the primary  
14 limitation is 7 randomized controlled studies were included in this study. However, some studies  
15 have limitations. Second, there is no unified standard for the using dose, the duration of tolvaptan  
16 use and follow-up time, which might affect the clinical outcomes. Finally, this analysis only include  
17 English language studies.

18  
19 **Word Count:**2253 words

### 20 21 22 **Introduction**

23  
24 Congestion is the primary reason for hospitalization in patients with acute decompensated  
25 heart failure (ADHF). Despite inpatient use of diuretics and vasodilators targeting decongestion,  
26 congestion is persistent in many ADHF patients at hospital discharge and has been associated  
27 with increased morbidity and mortality<sup>[1]</sup>. Currently, various types of therapeutic agents are used  
28 for heart failure (HF) as the standard treatment including diuretics, angiotensin-receptor  
29 blockers (ARB), angiotensin-converting enzymes inhibitors (ACE-I), and beta-blockers. These drugs  
30 still play an important role in the treatment of HF patients. Diuretics are the cornerstone of  
31 therapy for the treatment of congestion, which is an important component of ADHF treatment to  
32 improve oxygenation and relieve the signs and symptoms of edema, despite potential adverse  
33 effects related to renin-angiotensin-aldosterone system activation, electrolyte disturbances, and  
34 worsening renal function<sup>[2]</sup>.

35  
36  
37 Arginine-vasopressin (AVP) control the body water's content and blood pressure by affecting  
38 the rate of water excretion through the kidney<sup>[3]</sup>. AVP is secreted from the posterior pituitary in  
39 response to elevation in plasma osmolality and decreases in arterial pressure<sup>[4]</sup>. AVP causes water  
40 retention through the V<sub>2</sub> receptor to maintain the blood pressure. In patients with HF, there is an  
41 increased level of AVP, contributing to such symptoms as edema, dyspnea, and congestion<sup>[5]</sup>. The  
42 fatal disadvantages of loop diuretic treatment for patients with ADHF are activating  
43 neurohumoral factors and worsening renal function (WRF)<sup>[6]</sup>. WRF defined as an increase in  
44 serum creatinine of 0.3 mg/dL from baseline within 7 days from admission. Tolvaptan is an orally  
45 active, non-peptide, selective V<sub>2</sub> receptor antagonist. Selective AVP V<sub>2</sub> receptor antagonists  
46 induce hypotonic diuresis without significantly influencing the excretion of electrolytes<sup>[7]</sup>.  
47 Tolvaptan has been evaluated by many studies. Tolvaptan benefits patients with symptomatic HF  
48 in reducing body weight, increasing urine volume, increasing serum sodium, and without  
49 worsening renal function<sup>[8, 9]</sup>. Previous studies have demonstrated that in ADHF patients, early  
50 administration of oral tolvaptan in addition to standard therapy, including conventional diuretics,  
51 improved heart failure signs and symptoms without serious events<sup>[10-12]</sup>. The purpose of this study  
52 was to conduct a meta-analysis of randomised controlled trials (RCTs) focusing on the renal effects  
53  
54  
55  
56  
57  
58  
59

of tolvaptan in patients with ADHF in comparison with the effects of conventional diuretic agents.

## **METHODS**

This meta-analysis was conducted in compliance with the Preferred Reporting Items for Systematic Reviews and Meta-Analysis (PRISMA) statement<sup>[13]</sup>.

### **Search Procedure**

We searched MEDLINE, EMBASE, and the Cochrane Controlled Trials Registry, using combinations of the terms 'Tolvaptan', 'vasopressin V<sub>2</sub>-receptor blocker', 'acute heart failure', 'Acute Decompensated Heart Failure', both as test words and as MESH headings. All articles were available till October 31, 2017. Relevant studies were identified from the reference lists of selected articles and from review articles.

### **Study Selection**

Randomized controlled trials comparing tolvaptan add-on therapy with conventional therapy or other diuresis agents in patients with evidence of ADHF were included, with constraints on the time period till October 31, 2017. The processes of selection, data extraction, and quality assessment were independently performed by two reviewers. Disagreement was resolved by reviewing the relevant study to achieve consensus.

### **Inclusion criteria**

The inclusion criteria for the studies were as follows: it should (1) be a randomised, controlled trial (RCT); (2) include participants who are adult patients with ADHF, defined as patients had dyspnea at rest requiring urgent hospital admission for evaluation and treatment; (3) compare tolvaptan add-on therapy with conventional diuretics agents; and (4) include any relevant outcomes: all-cause mortality, WRF, sodium level, body weight reduction, and fluid loss.

### **Exclusion criteria**

The exclusion criteria were as follows: (1) observational study and (2) study on CHF or not reporting the desired outcome.

### **Data Extraction**

Data extraction from reports was performed, in line with the protocol, by the reviewers; disagreements were resolved by consensus. Attempts to contact all investigators were made to obtain raw data or to confirm details of the study design for all trials included. However, these attempts were not always successful.

For each of the trials included in the review the following characteristics were recorded: (1) First author's surname; (2) Year of publication; (3) Country where the study was performed; (4) Study design and characteristics; (5) Total number of participants; (6) inclusion and exclusion criteria; (7) Details about intervention arm; (8) Details about conventional/control arm; (9) dose of tolvaptan; (10) treatment duration; (11) Primary outcome evaluated; (12) Other outcome variables evaluated; (13) Quality indicators.

### **Assessment of risk of bias**

Risk of bias for included studies was independently assessed by two reviewers by the Cochrane risk of bias tool<sup>[14]</sup>. Disagreements were resolved by discussion.

### **Statistical analysis**

All of the meta-analytic procedures were conducted by using Review Manager software, version 5.3. Two-tailed P values < 0.05 were regarded as statistically significant. We used Q statistics, their related P values, and the I-square statistic to investigate the heterogeneity of each study. I-square statistic is a quantitative measure describing the percentage of total variation due

1  
2  
3 to heterogeneity. The extracted I-square statistic value was utilized to assess the heterogeneity of  
4 each variable across studies. According to the Cochrane Handbook, between study heterogeneity  
5 of variables is indicating significant heterogeneity when the I-square range from 50% to  
6 90%. Therefore, an I-square of <50% is considered acceptable. If the research results were not  
7 statistically different, the fixed effect model was used for meta-analysis. If there is statistical  
8 heterogeneity among the research results, the sources of heterogeneity is further analyzed. After  
9 excluding the obvious clinical heterogeneity, the random effects model was utilized to analyze the  
10 Meta.

### 11 12 **Results**

13  
14 Eight-hundred one articles were identified from the database research: 299 of PubMed,  
15 421 of EMBASE, and 71 of the Cochrane Library. By screening titles and abstracts, 566 apparently  
16 irrelevant articles were first excluded. Then, the full texts of remainders were downloaded to  
17 assess in detail. A full-text evaluation was performed and 21 were excluded for the following  
18 reasons: study about tolvaptan vs carperitide<sup>[15, 16]</sup> (n = 2), retrospective study (n = 7), study  
19 articles<sup>[17-19]</sup> defined as one Randomized Controlled Study<sup>[18]</sup>. Finally, seven RCTs<sup>[12, 18, 20-24]</sup> among  
20 nine articles were included. The flow diagram of study selection is shown in figure 1.  
21

### 22 **Study characteristics and quality**

23  
24 The study characteristics of the seven RCTs in the America, India, and Japan from 2012 to  
25 2017, recruiting 937 patients, are presented in Table 1. The duration of observations ranged from  
26 2 to 636 days. Most participants<sup>[12, 18, 20-23]</sup> had ADHF [Left ventricular ejection fraction (LVEF) <  
27 50%] of New York Heart Association (NYHA) class II-IV. One study focus on the ADHF patients with  
28 HFpEF<sup>[24]</sup>. Three of the studies used Carperitide<sup>[18, 23, 24]</sup>. The risk of bias was evaluated with the  
29 Cochrane risk of bias tool. Most items for all included RCTs showed low risk; however, there was  
30 insufficient information in some studies, which made the evaluation difficult. Overall, the RCTs  
31 included in our meta-analysis were of relatively high quality, except one study by Matsue et al<sup>[18]</sup>,  
32 which showed a high risk of bias. The results are summarised in figure 2.  
33  
34  
35  
36  
37  
38  
39  
40  
41  
42  
43  
44  
45  
46  
47  
48  
49  
50  
51  
52  
53  
54  
55  
56  
57  
58  
59  
60

Table 1 Baseline characteristics of the studies included in meta-analysis

| Study                  | Locat<br>ion | Sample<br>Size |                 | Intervention                                   |                            | LVEF          |              | age           |             | Follow-u<br>p<br>Duration | Primary Outcome                                                                                                              |
|------------------------|--------------|----------------|-----------------|------------------------------------------------|----------------------------|---------------|--------------|---------------|-------------|---------------------------|------------------------------------------------------------------------------------------------------------------------------|
|                        |              | Tolv<br>ptan   | Con<br>tro<br>l | Tolvaptan<br>Control                           | Control                    | Tolvapt<br>an | Contro<br>l  | Tolvapta<br>n | Contr<br>ol |                           |                                                                                                                              |
| Jujo<br>2016           | Japan        | 30             | 30              | Tolvaptan+<br>carperitid<br>e                  | furosemide+<br>carperitide | NA            | NA           | 79±11         | 79±<br>11   | 5 days                    | urine volume; serum<br>creatinine;<br>BUN;BNP;catecholamines                                                                 |
| Tamaki<br>2017         | Japan        | 26             | 24              | tolvaptan<br>(7.5or15mg<br>/day) +<br>diuretic | diuretic                   | 60.7<br>±10.0 | 59.7±<br>7.5 | 79±7          | 75±<br>10   | 48 hours                  | WRF, changes in Cr, BUN,<br>and eGFR                                                                                         |
| Konsta<br>m 2017<br>ca | Ameri<br>ca  | 122            | 128             | tolvaptan<br>30 mg+<br>diuretic                | placebo<br>+diuretic       | 35±<br>16     | 33±<br>17    | 70±11         | 67±<br>13   | 7days                     | WRF, weight<br>loss ;improvement in<br>spnea;change in eGFR Cr ;<br>death or<br>rehospitalization for HF<br>through 30 days. |
| Felker<br>2017<br>ca   | Ameri<br>ca  | 129            | 128             | tolvaptan<br>30 mg +loop<br>diuretic           | placebo+loo<br>p diuretic  | 34±<br>17     | 32±<br>17    | 66±13         | 63±<br>16   | 48h                       | Symptomatic endpoints,<br>decongestion and renal<br>endpoints, clinical<br>events                                            |
| Shanmu<br>gam<br>2016  | India        | 25             | 26              | tolvaptan<br>15mg+diure<br>tic                 | diuretic                   | 31.9<br>±12.2 | 29.2<br>±8.7 | 58.9±<br>12.1 | 57±<br>12   | 5 days                    | Serum sodium<br>concentration and Likert<br>score; adverse effects                                                           |

1  
2  
3  
4  
5  
6  
7  
8  
9  
10  
11  
12  
13  
14  
15  
16  
17  
18  
19  
20  
21  
22  
23  
24  
25  
26  
27  
28  
29  
30  
31  
32  
33  
34  
35  
36  
37  
38  
39  
40  
41  
42  
43  
44  
45  
46  
47

|                |                      |            |                                                 |                          |                 |                     |                 |                     |          |                                                                                            |
|----------------|----------------------|------------|-------------------------------------------------|--------------------------|-----------------|---------------------|-----------------|---------------------|----------|--------------------------------------------------------------------------------------------|
| Matsue<br>2016 | Japan<br>Ameri<br>ca | 108<br>109 | tolvaptan<br>15 mg<br>+conventio<br>nal therapy | conventiona<br>l therapy | 45.4<br>±18.1   | 46.8<br>±16.4       | 72.99±<br>8.9   | 72.95<br>±<br>10.24 | 636 days | WRF changes in body<br>weight, BNP, urine<br>volume; In-hospital<br>death; Adverse effects |
| Kimura<br>2015 | Japan                | 26<br>26   | tolvaptan+<br>furosemide<br>20mg                | furosemide               | 47.54<br>±16.75 | 56.73<br>±<br>11.52 | 80.54±<br>12.15 | 86.15<br>±<br>4.95  | 7days    | WRF changes in Cr, BUN/Cr,<br>and eGFR; Adverse effects                                    |



### Effect of tolvaptan add-on therapy on WRF

Seven studies evaluating the effect of tolvaptan add-on therapy on WRF in patients with acute decompensated heart failure. Meta-analysis showed that  $I^2=66\%$ ,  $P=0.007$ , the heterogeneity was high, so using a random effect model. Meta analysis (random effect model) showed that tolvaptan adding on loop diuretic comparing with controls or loop diuretic agents can not significantly reduce the incidence of WRF [RR=0.78, 95%CI (0.48, 1.26),  $P=0.31$ ] in Acute heart failure patients complicated with hyponatremia or renal dysfunction. As shown in figure 3. Omitting the studies that used carperitide<sup>[18, 23, 24]</sup> in both group decreased the heterogeneity ( $I^2=55\%$ ,  $P=0.08$ ), and the pooled RR neutral (RR=1.05, 95% CI( 0.71 , 1.54),  $P=0.82$ ) in the random effects model. As shown in figure 4. Heterogeneity was significantly decreased ( $I^2=32\%$ ,  $P=0.23$ ) when restricting the analysis to using carperitide studies<sup>[18, 23, 24]</sup>, producing a pooled WRF [RR=0.32 95% CI(0.15 , 0.71),  $P=0.005$ ], of significantly in favor of tolvaptan add-on therapy compared to control. As shown in figure 5.

### Effect of tolvaptan add-on therapy on Body Weight

Mean body weight reflected the aquaretic effect of tolvaptan add-on therapy in ADHF patients. Three studies<sup>[18, 20, 21]</sup> were included in the meta-analysis of change in body weight from baseline to 48 hours. There was a significant difference between the tolvaptan add-on therapy and control arms in favor of tolvaptan add-on therapy, with an SMD[SMD=-0.49 95% CI(-0.64 , -0.34 ),  $P<0.000001$ ] in body weight change. As shown in figure 6.

### Effect of tolvaptan add-on therapy on short-term mortality

Five studies<sup>[18, 20-23]</sup> described the effect of tolvaptan add-on therapy on all-cause mortality. The pooled effect of tolvaptan add-on therapy on mortality including those five trials was not significantly different from control [RR=0.85 95%CI(0.47 1.56),  $P=0.61$ ]. As shown in figure 7.

### Effect of tolvaptan add-on therapy on Serum Sodium

Although studies looked at change of serum sodium over different time scales, there was a change in serum sodium in favor of tolvaptan add-on therapy and every included trial individually yielded similar results.

### Discussion

The main findings of this meta-analysis indicate that tolvaptan add-on therapy not ameliorate incidence of WRF, short-term all-cause mortality in patients with ADHF. However, tolvaptan add-on therapy could reduce body weight, and elevate sodium level in patients with ADHF. A great majority of ADHF admissions are related to volume overload and congestion, and decongestion with loop diuretics remains the mainstay of current ADHF therapy. It has been suggested that immediate intravascular volume reduction induced by decongestion therapy using loop diuretics can cause WRF. WRF may through activation of the renin-angiotensin-aldosterone (RAA) and sympathetic nervous systems, leading to a decrease in renal perfusion and glomerular filtration pressure<sup>[25]</sup>. Renal dysfunction is also a common comorbidity in ADHF patients, and it forebodes higher rates of mortality and hospitalisation in patients with ADHF to a great extent<sup>[26]</sup>. There is an urgent need for an alternative approach to achieve adequate decongestion without the risk of WRF in ADHF patients<sup>[27]</sup>. Tolvaptan has been shown to alleviate congestion without a reduction in renal blood flow or activation of the RAA and sympathetic nervous systems<sup>[5]</sup>. Renal protective treatment could greatly improve the prognosis of HF patients<sup>[28]</sup>. However, in our analysis, WRF had no statistical significance; the mean body weight decreased and sodium concentration increased.

1  
2  
3 In our analysis, although tolvaptan add-on therapy had no effect on WRF overall, while in  
4 the studies using carperitide, tolvaptan add-on therapy decreased the rate of WRF. The results  
5 indicated that use of tolvaptan add-on therapy combining with carperitide in AHF might reduce  
6 WRF compared with the administration of loop diuretics. Carperitide may elicits natriuretic,  
7 diuretic, and vasorelaxant effects, all of which are directed to the reduction of body fluid and the  
8 maintenance of blood pressure homeostasis, which consequently increases cardiac output  
9 without direct inotropic effects<sup>[29]</sup>. There might have been a synergy effect if we had used  
10 tolvaptan and carperitide in combination. This result should be carefully  
11 interpreted, however, because there are several limitations of carperitide and it was not a  
12 prespecified outcome. Carperitide is not used in ADHF therapy in Western countries and  
13 associated with increased in-hospital mortality rate in AHF patients. It is the necessity for well  
14 designed randomized clinical trials of carperitide to determine its clinical safety and  
15 effectiveness<sup>[30]</sup>.

16  
17  
18  
19 Aggressive fluid removal therapy is strongly recommended for symptom relief and  
20 hemodynamic improvement in ADHF. Tolvaptan add-on therapy could significantly reduce body  
21 weight, however, tolvaptan add-on therapy not ameliorate incidence of WRF, short-term all-cause  
22 mortality. Tolvaptan may like ultrafiltration acting as a decongestion method. Therefore, rapid and  
23 aggressive decongestion treatment may precede WRF for ameliorate congestion during  
24 hospitalization, irrespective of the decongestion method. In the Ultrafiltration vs. Intravenous  
25 Diuretics for Patients Hospitalized for Acute Decompensated Congestive Heart Failure (UNLOAD)  
26 trial, greater weight loss and a trend toward WRF by ultrafiltration compared with conventional  
27 diuretic therapy were associated with a reduced rate of rehospitalization for HF<sup>[31]</sup>. The short  
28 term of therapy may have been one factor in the failure to achieve long-term effects, although  
29 other short-term interventions can at times have long-term effects.

### 30 31 32 **limitations**

33  
34 There are a number of limitations in the meta-analysis. Firstly, a total of 7 randomized  
35 controlled studies were included in this study, but most of the studies have some limitations. The  
36 inclusion of the study was more concentrated in the same region and country. although the  
37 studies were randomized controlled trials, but the study of the distribution of hidden, the specific  
38 random method is not a complete description, there is no evidence to rule out the possibility of  
39 patient selection bias. Only two studies from the selected trials measured long-term mortality and  
40 four studies had the outcome of short-term mortality. Secondly, there is no unified standard for  
41 the using dose, the duration of tolvaptan use and follow-up time, which might affect the clinical  
42 outcomes. Third, differences in race, age, and complication among studies may result in slightly  
43 diverse response to therapy. Fourth, different control treatments might also lead to inaccurate  
44 results. In addition, the sample size of some RCTs was too small. Therefore, this meta-analysis  
45 also has certain enlightenment to the future randomized controlled trial: (1) Uniform drug  
46 administration time and dosage; (2) The articles included in the study should come from different  
47 countries and regions, in order to clarify the clinical effect of different countries and nationalities,  
48 so as to draw the correct conclusion.

### 49 50 51 52 **Conclusions**

53  
54 We observed that tolvaptan add-on therapy not ameliorate incidence of WRF, short-term  
55 all-cause mortality in patients with ADHF. However, tolvaptan add-on therapy could reduce body  
56 weight, elevate sodium level in patients with ADHF. Due to the limitations of the quality and  
57

1  
2  
3 quantity of the articles, this conclusion still needs further research to confirm.  
4  
5  
6  
7

8 **Contributors:** Guang Ma is the guarantor. Guang Ma drafted the manuscript. All the authors  
9 contributed to the development of the selection criteria, the risk of bias assessment strategy and  
10 data extraction criteria, the search strategy and statistical expertise. All the authors read,  
11 provided feedback and approved the final manuscript. Guang Ma and Xixi Ma conceived and  
12 designed the experiments. Guang Ma, Xixi Ma and Guoliang Wang performed the experiments.  
13 Guang Ma and Wei Teng analysed the data. Guang Ma and Xuezhi Hui contributed  
14 reagents/materials/analysis tools. Guang Ma wrote the paper.  
15

16 **Funding** This research received no specific grant from any funding agency in the public,  
17 commercial or not-for-profit sectors.  
18

19 **Competing interests:** None declared.

20 **Patient consent:** Obtained.

21 **Ethics approval:** Committee on Publication Ethics.

22 **Provenance and peer review** :Not commissioned; externally peer reviewed.  
23

24 **Data sharing statement:** No additional data are available.  
25  
26  
27

## 28 Reference

- 29 1. Ambrosy AP, Pang PS, Khan S, et al. Clinical course and predictive value of congestion during  
30 hospitalization in patients admitted for worsening signs and symptoms of heart failure with  
31 reduced ejection fraction: findings from the EVEREST trial. *European heart journal*  
32 2013;**34**(11):835-43 doi: 10.1093/eurheartj/ehs444[published Online First: Epub Date]].  
33
- 34 2. Hardin EA, Grodin JL. Diuretic Strategies in Acute Decompensated Heart Failure. *Current heart*  
35 *failure reports* 2017;**14**(2):127-33 doi: 10.1007/s11897-017-0319-y[published Online First:  
36 Epub Date]].
- 37 3. Ishikawa SE, Saito T, Saito T, Kasono K, Funayama H. Pathophysiological role of aquaporin-2 in  
38 impaired water excretion. *Progress in brain research* 2008;**170**:581-8 doi:  
39 10.1016/s0079-6123(08)00445-7[published Online First: Epub Date]].  
40
- 41 4. Lee CR, Watkins ML, Patterson JH, et al. Vasopressin: a new target for the treatment of heart failure.  
42 *American heart journal* 2003;**146**(1):9-18 doi: 10.1016/s0002-8703(02)94708-3[published  
43 Online First: Epub Date]].
- 44 5. Costello-Boerrigter LC, Smith WB, Boerrigter G, et al. Vasopressin-2-receptor antagonism augments  
45 water excretion without changes in renal hemodynamics or sodium and potassium excretion  
46 in human heart failure. *American journal of physiology. Renal physiology* 2006;**290**(2):F273-8  
47 doi: 10.1152/ajprenal.00195.2005[published Online First: Epub Date]].  
48
- 49 6. Salah K, Kok WE, Eurlings LW, et al. Competing Risk of Cardiac Status and Renal Function During  
50 Hospitalization for Acute Decompensated Heart Failure. *JACC. Heart failure*  
51 2015;**3**(10):751-61 doi: 10.1016/j.jchf.2015.05.009[published Online First: Epub Date]].  
52
- 53 7. Izumi Y, Miura K, Iwao H. Therapeutic Potential of Vasopressin-Receptor Antagonists in Heart Failure.  
54 *Journal of Pharmacological Sciences* 2014;**124**(1):1-6 doi: 10.1254/jphs.13R13CP[published  
55 Online First: Epub Date]].  
56  
57  
58  
59

- 1
- 2
- 3 8. Alskaf E, Tridente A, Al-Mohammad A. Tolvaptan for Heart Failure, Systematic Review and  
4 Meta-Analysis of Trials. *Journal of cardiovascular pharmacology* 2016;**68**(3):196-203 doi:  
5 10.1097/fjc.0000000000000405[published Online First: Epub Date]].
- 6
- 7 9. Wu MY, Chen TT, Chen YC, et al. Effects and safety of oral tolvaptan in patients with congestive heart  
8 failure: A systematic review and network meta-analysis. *PLoS one* 2017;**12**(9):e0184380 doi:  
9 10.1371/journal.pone.0184380[published Online First: Epub Date]].
- 10
- 11 10. Konstam MA, Gheorghide M, Burnett JC, Jr., et al. Effects of oral tolvaptan in patients hospitalized  
12 for worsening heart failure: the EVEREST Outcome Trial. *Jama* 2007;**297**(12):1319-31 doi:  
13 10.1001/jama.297.12.1319[published Online First: Epub Date]].
- 14
- 15 11. Gheorghide M, Konstam MA, Burnett JC, Jr., et al. Short-term clinical effects of tolvaptan, an oral  
16 vasopressin antagonist, in patients hospitalized for heart failure: the EVEREST Clinical Status  
17 Trials. *Jama* 2007;**297**(12):1332-43 doi: 10.1001/jama.297.12.1332[published Online First:  
18 Epub Date]].
- 19
- 20 12. Kimura K, Momose T, Hasegawa T, et al. Early administration of tolvaptan preserves renal function  
21 in elderly patients with acute decompensated heart failure. *Journal of cardiology*  
22 2016;**67**(5):399-405 doi: 10.1016/j.jcc.2015.09.020[published Online First: Epub Date]].
- 23
- 24 13. Liberati A, Altman DG, Tetzlaff J, et al. The PRISMA statement for reporting systematic reviews and  
25 meta-analyses of studies that evaluate health care interventions: explanation and elaboration.  
26 *Annals of internal medicine* 2009;**151**(4):W65-94
- 27
- 28 14. Higgins JP, Altman DG, Gotzsche PC, et al. The Cochrane Collaboration's tool for assessing risk of  
29 bias in randomised trials. *BMJ* (Clinical research ed.) 2011;**343**:d5928 doi:  
30 10.1136/bmj.d5928[published Online First: Epub Date]].
- 31
- 32 15. Suzuki S, Yoshihisa A, Yamaki T, et al. Acute heart failure volume control multicenter randomized  
33 (AVCMA) trial: comparison of tolvaptan and carperitide. *Journal of clinical pharmacology*  
34 2013;**53**(12):1277-85 doi: 10.1002/jcph.197[published Online First: Epub Date]].
- 35
- 36 16. Suzuki S, Yoshihisa A, Yamaki T, et al. Long-term effects and prognosis in acute heart failure treated  
37 with tolvaptan: the AVCMA trial. *BioMed research international* 2014;**2014**:704289 doi:  
38 10.1155/2014/704289[published Online First: Epub Date]].
- 39
- 40 17. Matsue Y, Suzuki M, Nagahori W, et al. Clinical effectiveness of tolvaptan in patients with acute  
41 decompensated heart failure and renal failure: design and rationale of the AQUAMARINE  
42 study. *Cardiovascular drugs and therapy* 2014;**28**(1):73-7 doi:  
43 10.1007/s10557-013-6491-8[published Online First: Epub Date]].
- 44
- 45 18. Matsue Y, Suzuki M, Torii S, et al. Clinical Effectiveness of Tolvaptan in Patients With Acute Heart  
46 Failure and Renal Dysfunction. *Journal of cardiac failure* 2016;**22**(6):423-32 doi:  
47 10.1016/j.cardfail.2016.02.007[published Online First: Epub Date]].
- 48
- 49 19. Matsue Y, Suzuki M, Torii S, et al. Prognostic impact of early treatment with tolvaptan in patients  
50 with acute heart failure and renal dysfunction. *International journal of cardiology*  
51 2016;**221**:188-93 doi: 10.1016/j.ijcard.2016.07.063[published Online First: Epub Date]].
- 52
- 53 20. Konstam MA, Kiernan M, Chandler A, et al. Short-Term Effects of Tolvaptan in Patients With Acute  
54 Heart Failure and Volume Overload. *Journal of the American College of Cardiology*  
55 2017;**69**(11):1409-19 doi: 10.1016/j.jacc.2016.12.035[published Online First: Epub Date]].
- 56
- 57 21. Felker GM, Mentz RJ, Cole RT, et al. Efficacy and Safety of Tolvaptan in Patients Hospitalized With  
58 Acute Heart Failure. *Journal of the American College of Cardiology* 2017;**69**(11):1399-406 doi:  
59 10.1016/j.jacc.2016.09.004[published Online First: Epub Date]].
- 60

- 1
- 2
- 3 22. Shanmugam E, Doss CR, George M, et al. Effect of tolvaptan on acute heart failure with
- 4 hyponatremia--a randomized, double blind, controlled clinical trial. *Indian heart journal*
- 5 2016;**68 Suppl 1**:S15-21 doi: 10.1016/j.ihj.2015.07.006[published Online First: Epub Date]].
- 6
- 7 23. Jujo K, Saito K, Ishida I, et al. Randomized pilot trial comparing tolvaptan with furosemide on renal
- 8 and neurohumoral effects in acute heart failure. *ESC heart failure* 2016;**3**(3):177-88 doi:
- 9 10.1002/ehf2.12088[published Online First: Epub Date]].
- 10
- 11 24. Tamaki S, Sato Y, Yamada T, et al. Tolvaptan Reduces the Risk of Worsening Renal Function in
- 12 Patients With Acute Decompensated Heart Failure and Preserved Left Ventricular Ejection
- 13 Fraction- Prospective Randomized Controlled Study. *Circulation journal : official journal of the*
- 14 *Japanese Circulation Society* 2017;**81**(5):740-47 doi: 10.1253/circj.CJ-16-1122[published
- 15 Online First: Epub Date]].
- 16
- 17 25. Ronco C, Cicoira M, McCullough PA. Cardiorenal syndrome type 1: pathophysiological crosstalk
- 18 leading to combined heart and kidney dysfunction in the setting of acutely decompensated
- 19 heart failure. *Journal of the American College of Cardiology* 2012;**60**(12):1031-42 doi:
- 20 10.1016/j.jacc.2012.01.077[published Online First: Epub Date]].
- 21
- 22 26. Metra M, Cotter G, Senger S, et al. Prognostic Significance of Creatinine Increases During an Acute
- 23 Heart Failure Admission in Patients With and Without Residual Congestion: A Post Hoc
- 24 Analysis of the PROTECT Data. *Circulation. Heart failure* 2018;**11**(5):e004644 doi:
- 25 10.1161/circheartfailure.117.004644[published Online First: Epub Date]].
- 26
- 27 27. Goldsmith SR, Bart BA, Burnett J. Decongestive therapy and renal function in acute heart failure:
- 28 time for a new approach? *Circulation. Heart failure* 2014;**7**(3):531-5 doi:
- 29 10.1161/circheartfailure.113.000828[published Online First: Epub Date]].
- 30
- 31 28. Damman K, Valente MA, Voors AA, O'Connor CM, van Veldhuisen DJ, Hillege HL. Renal impairment,
- 32 worsening renal function, and outcome in patients with heart failure: an updated
- 33 meta-analysis. *European heart journal* 2014;**35**(7):455-69 doi:
- 34 10.1093/eurheartj/eh386[published Online First: Epub Date]].
- 35
- 36 29. Nomura F, Kurobe N, Mori Y, et al. Multicenter prospective investigation on efficacy and safety of
- 37 carperitide as a first-line drug for acute heart failure syndrome with preserved blood pressure:
- 38 COMPASS: Carperitide Effects Observed Through Monitoring Dyspnea in Acute
- 39 Decompensated Heart Failure Study. *Circulation journal : official journal of the Japanese*
- 40 *Circulation Society* 2008;**72**(11):1777-86
- 41
- 42 30. Matsue Y, Kagiya N, Yoshida K, et al. Carperitide Is Associated With Increased In-Hospital
- 43 Mortality in Acute Heart Failure: A Propensity Score-Matched Analysis. *Journal of cardiac*
- 44 *failure* 2015;**21**(11):859-64 doi: 10.1016/j.cardfail.2015.05.007[published Online First: Epub
- 45 Date]].
- 46
- 47 31. Costanzo MR, Guglin ME, Saltzberg MT, et al. Ultrafiltration versus intravenous diuretics for
- 48 patients hospitalized for acute decompensated heart failure. *Journal of the American College*
- 49 *of Cardiology* 2007;**49**(6):675-83 doi: 10.1016/j.jacc.2006.07.073[published Online First: Epub
- 50 Date]].
- 51
- 52
- 53
- 54
- 55
- 56
- 57
- 58
- 59

1  
2  
3  
4 Figure.1 Flow diagram of study selection

5 Figure 2 Risk of bias summary

6 Figure 3 Forest plot depicting the effect of tolvaptan on worsening renal function versus  
7 Control

8 Figure 4 Tolvaptan without carperitide

9 Figure 5 Tolvaptan with carperitide

10 Figure 6 Forest plot depicting the effect of tolvaptan on body weight reductions versus  
11 control

12 Figure 7 Forest plot depicting the effect of tolvaptan on mortality versus control  
13  
14  
15  
16  
17  
18  
19  
20  
21  
22  
23  
24  
25  
26  
27  
28  
29  
30  
31  
32  
33  
34  
35  
36  
37  
38  
39  
40  
41  
42  
43  
44  
45  
46  
47  
48  
49  
50  
51  
52  
53  
54  
55  
56  
57  
58  
59  
60

Figure.1 Flow diagram of study selection

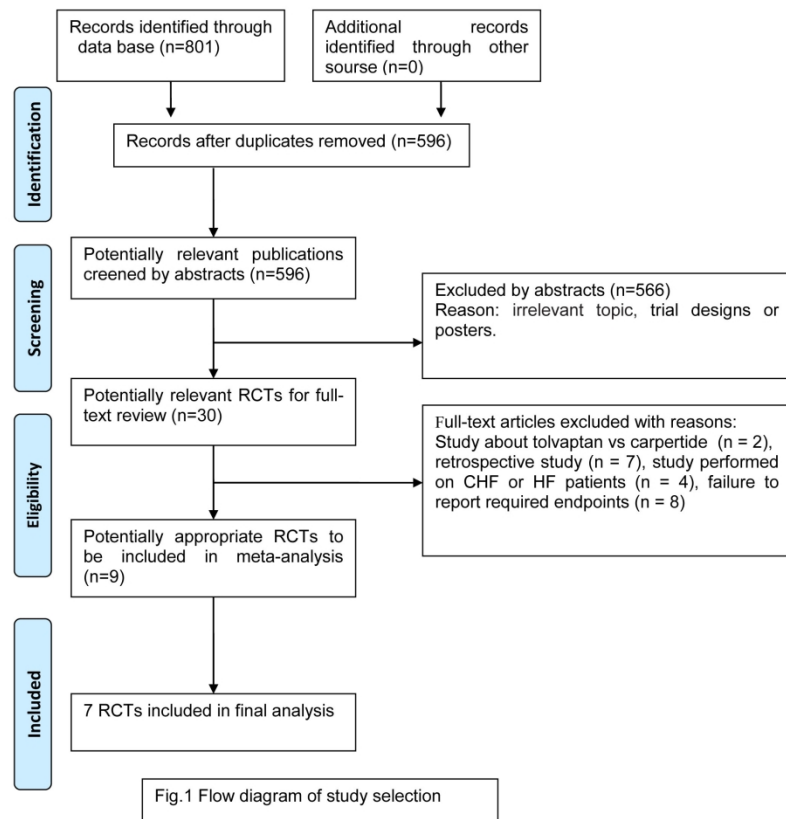

Six-hundred ninety-one articles were identified from the database research: 299 of PubMed, 421 of EMBASE, and 71 of the Cochrane Library. After screening the titles and abstracts, 30 studies eligible for full text screening were identified. A full-text evaluation was performed and 21 were excluded for the following reasons: study about tolvaptan vs carperitide (n = 2), retrospective study (n = 7), study performed on CHF or HF patients (n = 4), failure to report required endpoints (n = 8). Finally, seven RCTs among nine articles were included.

F

Figure.1

193x267mm (300 x 300 DPI)

|                | Random sequence generation (selection bias) | Allocation concealment (selection bias) | Blinding of participants and personnel (performance bias) | Blinding of outcome assessment (detection bias) | Incomplete outcome data (attrition bias) | Selective reporting (reporting bias) | Other bias |
|----------------|---------------------------------------------|-----------------------------------------|-----------------------------------------------------------|-------------------------------------------------|------------------------------------------|--------------------------------------|------------|
| Felker 2017    | ?                                           | +                                       | +                                                         | +                                               | +                                        | +                                    | +          |
| Jujo 2016      | -                                           | +                                       | -                                                         | -                                               | +                                        | +                                    | +          |
| Kimura 2015    | ?                                           | +                                       | -                                                         | ?                                               | +                                        | +                                    | +          |
| Konstam 2017   | +                                           | +                                       | +                                                         | +                                               | +                                        | +                                    | +          |
| Matsue 2016    | -                                           | -                                       | -                                                         | ?                                               | +                                        | +                                    | +          |
| Shanmugam 2016 | ?                                           | ?                                       | +                                                         | +                                               | +                                        | +                                    | +          |
| Tamaki 2017    | +                                           | +                                       | ?                                                         | +                                               | +                                        | +                                    | +          |

Figure 2

162x264mm (300 x 300 DPI)



1  
2  
3  
4  
5  
6  
7  
8  
9  
10  
11  
12  
13  
14  
15  
16  
17  
18  
19  
20  
21  
22  
23  
24  
25  
26  
27  
28  
29  
30  
31  
32  
33  
34  
35  
36  
37  
38  
39  
40  
41  
42  
43  
44  
45  
46  
47  
48  
49  
50  
51  
52  
53  
54  
55  
56  
57  
58  
59  
60

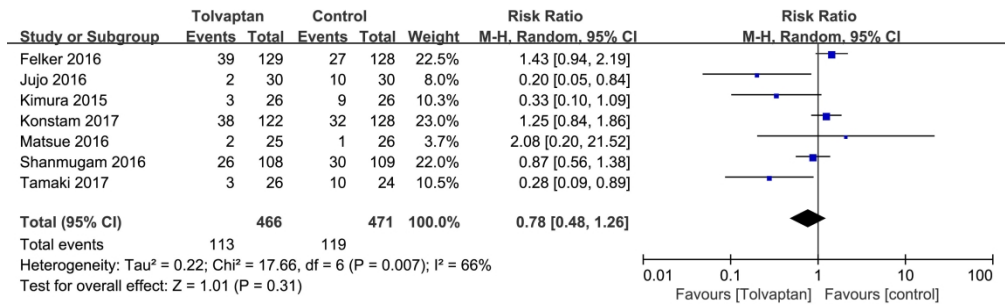

Figure 3

291x90mm (300 x 300 DPI)

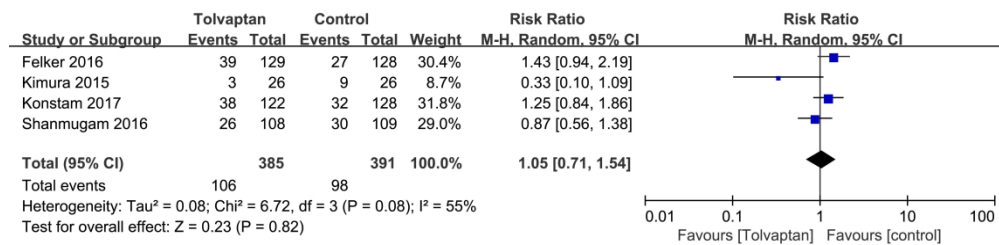

Figure 4

364x90mm (300 x 300 DPI)

1  
2  
3  
4  
5  
6  
7  
8  
9  
10  
11  
12  
13  
14  
15  
16  
17  
18  
19  
20  
21  
22  
23  
24  
25  
26  
27  
28  
29  
30  
31  
32  
33  
34  
35  
36  
37  
38  
39  
40  
41  
42  
43  
44  
45  
46  
47  
48  
49  
50  
51  
52  
53  
54  
55  
56  
57  
58  
59  
60

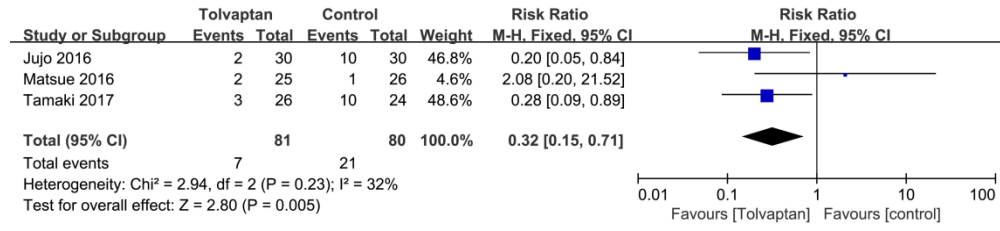

Figure 5

389x90mm (300 x 300 DPI)

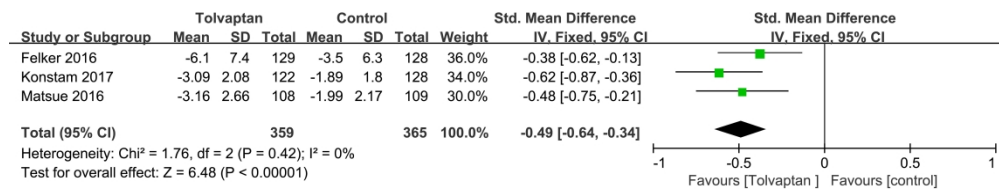

Figure 6

469x90mm (300 x 300 DPI)

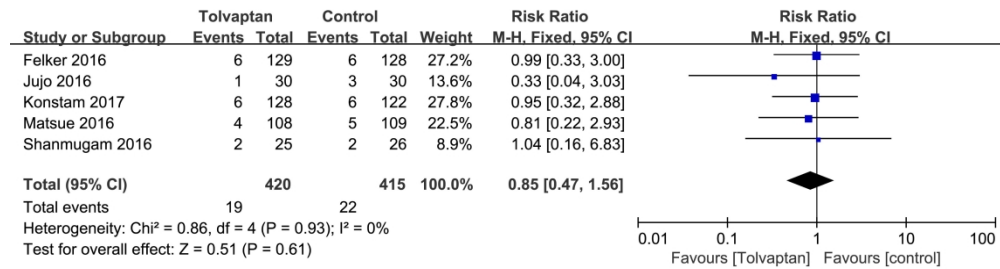

Figure 7

329x90mm (300 x 300 DPI)

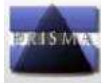

# PRISMA 2009 Checklist

| Section/topic                      | #  | Checklist item                                                                                                                                                                                                                                                                                              | Reported on page # |
|------------------------------------|----|-------------------------------------------------------------------------------------------------------------------------------------------------------------------------------------------------------------------------------------------------------------------------------------------------------------|--------------------|
| <b>TITLE</b>                       |    |                                                                                                                                                                                                                                                                                                             |                    |
| Title                              | 1  | Identify the report as a systematic review, meta-analysis, or both.                                                                                                                                                                                                                                         | 1                  |
| <b>ABSTRACT</b>                    |    |                                                                                                                                                                                                                                                                                                             |                    |
| Structured summary                 | 2  | Provide a structured summary including, as applicable: background; objectives; data sources; study eligibility criteria, participants, and interventions; study appraisal and synthesis methods; results; limitations; conclusions and implications of key findings; systematic review registration number. | 1                  |
| <b>INTRODUCTION</b>                |    |                                                                                                                                                                                                                                                                                                             |                    |
| Rationale                          | 3  | Describe the rationale for the review in the context of what is already known.                                                                                                                                                                                                                              | 2                  |
| Objectives                         | 4  | Provide an explicit statement of questions being addressed with reference to participants, interventions, comparisons, outcomes, and study design (PICOS).                                                                                                                                                  | 2                  |
| <b>METHODS</b>                     |    |                                                                                                                                                                                                                                                                                                             |                    |
| Protocol and registration          | 5  | Indicate if a review protocol exists, if and where it can be accessed (e.g., Web address), and, if available, provide registration information including registration number.                                                                                                                               | 3                  |
| Eligibility criteria               | 6  | Specify study characteristics (e.g., PICOS, length of follow-up) and report characteristics (e.g., years considered, language, publication status) used as criteria for eligibility, giving rationale.                                                                                                      | 3                  |
| Information sources                | 7  | Describe all information sources (e.g., databases with dates of coverage, contact with study authors to identify additional studies) in the search and date last searched.                                                                                                                                  | 3                  |
| Search                             | 8  | Present full electronic search strategy for at least one database, including any limits used, such that it could be repeated.                                                                                                                                                                               | 3                  |
| Study selection                    | 9  | State the process for selecting studies (i.e., screening, eligibility, included in systematic review, and, if applicable, included in the meta-analysis).                                                                                                                                                   | 3                  |
| Data collection process            | 10 | Describe method of data extraction from reports (e.g., piloted forms, independently, in duplicate) and any processes for obtaining and confirming data from investigators.                                                                                                                                  | 3                  |
| Data items                         | 11 | List and define all variables for which data were sought (e.g., PICOS, funding sources) and any assumptions and simplifications made.                                                                                                                                                                       | 3                  |
| Risk of bias in individual studies | 12 | Describe methods used for assessing risk of bias of individual studies (including specification of whether this was done at the study or outcome level), and how this information is to be used in any data synthesis.                                                                                      | 3                  |
| Summary measures                   | 13 | State the principal summary measures (e.g., risk ratio, difference in means).                                                                                                                                                                                                                               | 3                  |
| Synthesis of results               | 14 | Describe the methods of handling data and combining results of studies, if done, including measures of consistency (e.g., $I^2$ ) for each meta-analysis.                                                                                                                                                   | 3-4                |

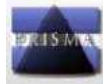

## PRISMA 2009 Checklist

1  
2  
3  
4  
5  
6  
7  
8  
9  
10  
11  
12  
13  
14  
15  
16  
17  
18  
19  
20  
21  
22  
23  
24  
25  
26  
27  
28  
29  
30  
31  
32  
33  
34  
35  
36  
37  
38  
39  
40  
41  
42  
43  
44  
45  
46  
47

| Section/topic                 | #  | Checklist item                                                                                                                                                                                           | Reported on page # |
|-------------------------------|----|----------------------------------------------------------------------------------------------------------------------------------------------------------------------------------------------------------|--------------------|
| Risk of bias across studies   | 15 | Specify any assessment of risk of bias that may affect the cumulative evidence (e.g., publication bias, selective reporting within studies).                                                             | 3                  |
| Additional analyses           | 16 | Describe methods of additional analyses (e.g., sensitivity or subgroup analyses, meta-regression), if done, indicating which were pre-specified.                                                         | 3                  |
| <b>RESULTS</b>                |    |                                                                                                                                                                                                          |                    |
| Study selection               | 17 | Give numbers of studies screened, assessed for eligibility, and included in the review, with reasons for exclusions at each stage, ideally with a flow diagram.                                          | 4                  |
| Study characteristics         | 18 | For each study, present characteristics for which data were extracted (e.g., study size, PICOS, follow-up period) and provide the citations.                                                             | 4-6                |
| Risk of bias within studies   | 19 | Present data on risk of bias of each study and, if available, any outcome level assessment (see item 12).                                                                                                | 7                  |
| Results of individual studies | 20 | For all outcomes considered (benefits or harms), present, for each study: (a) simple summary data for each intervention group (b) effect estimates and confidence intervals, ideally with a forest plot. | 7                  |
| Synthesis of results          | 21 | Present results of each meta-analysis done, including confidence intervals and measures of consistency.                                                                                                  | 7                  |
| Risk of bias across studies   | 22 | Present results of any assessment of risk of bias across studies (see Item 15).                                                                                                                          |                    |
| Additional analysis           | 23 | Give results of additional analyses, if done (e.g., sensitivity or subgroup analyses, meta-regression [see Item 16]).                                                                                    | 7                  |
| <b>DISCUSSION</b>             |    |                                                                                                                                                                                                          |                    |
| Summary of evidence           | 24 | Summarize the main findings including the strength of evidence for each main outcome; consider their relevance to key groups (e.g., healthcare providers, users, and policy makers).                     | 7                  |
| Limitations                   | 25 | Discuss limitations at study and outcome level (e.g., risk of bias), and at review-level (e.g., incomplete retrieval of identified research, reporting bias).                                            | 7                  |
| Conclusions                   | 26 | Provide a general interpretation of the results in the context of other evidence, and implications for future research.                                                                                  | 7                  |
| <b>FUNDING</b>                |    |                                                                                                                                                                                                          |                    |
| Funding                       | 27 | Describe sources of funding for the systematic review and other support (e.g., supply of data); role of funders for the systematic review.                                                               | 8                  |

From: Moher D, Liberati A, Tetzlaff J, Altman DG, The PRISMA Group (2009). Preferred Reporting Items for Systematic Reviews and Meta-Analyses: The PRISMA Statement. PLoS Med 6(7): e1000097. doi:10.1371/journal.pmed1000097

For more information, visit: [www.prisma-statement.org](http://www.prisma-statement.org).

# BMJ Open

## Effects of Tolvaptan Add-on Therapy in Patients with Acute Heart Failure: Meta-analysis on Randomized Controlled Trials

|                                 |                                                                                                                                                                                                                                                                                                                                     |
|---------------------------------|-------------------------------------------------------------------------------------------------------------------------------------------------------------------------------------------------------------------------------------------------------------------------------------------------------------------------------------|
| Journal:                        | <i>BMJ Open</i>                                                                                                                                                                                                                                                                                                                     |
| Manuscript ID                   | bmjopen-2018-025537.R1                                                                                                                                                                                                                                                                                                              |
| Article Type:                   | Research                                                                                                                                                                                                                                                                                                                            |
| Date Submitted by the Author:   | 10-Jan-2019                                                                                                                                                                                                                                                                                                                         |
| Complete List of Authors:       | Ma, Guang; The First Affiliated Hospital of Henan University;<br>Ma, Xixi; The First Affiliated Hospital of Henan University<br>Wang, Guoliang; The First Affiliated Hospital of Henan University<br>Teng, Wei; The First Affiliated Hospital of Henan University<br>Hui, Xuezhi; The First Affiliated Hospital of Henan University |
| <b>Primary Subject Heading</b>: | Cardiovascular medicine                                                                                                                                                                                                                                                                                                             |
| Secondary Subject Heading:      | Cardiovascular medicine                                                                                                                                                                                                                                                                                                             |
| Keywords:                       | tolvaptan, worsening renal function, acute decompensated heart failure, meta-analysis                                                                                                                                                                                                                                               |
|                                 |                                                                                                                                                                                                                                                                                                                                     |

SCHOLARONE™  
Manuscripts



1  
2  
3  
4  
5 Effects of Tolvaptan Add-on Therapy in Patients with Acute Heart Failure: Meta-analysis on  
6 Randomized Controlled Trials

7 Guang Ma, Xixi Ma, Guoliang Wang, Wei Teng, Xuezhi Hui, Guang Ma \*

8  
9  
10 Department of Cardiology, The First Affiliated Hospital of Henan University, Kaifeng, Henan,  
11 China,

12 \* Correspondence: Guang Ma, Department of Cardiology, The First Affiliated Hospital of Henan  
13 University, Kaifeng, Henan, China,  
14 China (e-mail: maguang870407@163.com).  
15

16 **Abstract**

17 **Objectives:** Treating Acute Decompensated Heart Failure (ADHF) for improving congestion with  
18 diuretics may cause Worsening Renal Function(WRF), but the clinical efficacy of tolvaptan add-on  
19 therapy on reducing WRF in ADHF patients is inconsistent. To evaluate the effects of tolvaptan  
20 add-on therapy on reducing WRF in ADHF patients.  
21

22 **Methods:** Meta-analysis of randomised trials of tolvaptan add-on therapy on reducing WRF in  
23 ADHF patients. The MEDLINE, Embase and Cochrane Central Register of Controlled Trials  
24 databases were searched for relevant articles from their inception to October 31, 2017. Two  
25 reviewers filtrated the documents on WRF, short-term all-cause mortality, body weight  
26 decreased, elevated sodium level for calculating Pooled Relatives Risks (PRs), weighted mean  
27 difference and associated 95% CIs. We used fixed-effects or random-effects models according to  
28  $I^2$  statistics.  
29

30 **Achievements:** Seven random controlled trials with 937 patients were included for analysis.  
31 Compared with the control, tolvaptan add-on therapy did not improve incidence of worsening  
32 renal function(RR (95% confidence interval, CI) 0.78; 95% CI 0.48 to 1.26;  $p=0.31$ ;  $I^2=66\%$ ) and  
33 short-term all-cause mortality (RR 0.85; 95% CI 0.47 to 1.56;  $p=0.61$ ;  $I^2=0\%$ ). On subgroup analyses,  
34 there was a suggestion of possible effect modification by dose of tolvaptan, in which benefit was  
35 observed in low-dose( $\leq 15$  mg/day) group(RR 0.48; 95% CI 0.23 to 1.02;  $p=0.05$ ;  $I^2=54\%$ ), but not  
36 with high-dose(30mg) group(RR 1.33; 95% CI 0.99 to 1.78;  $p=0.05$ ;  $I^2=0\%$ ). However, tolvaptan  
37 add-on therapy reduced body weight in two days (standardized mean difference (SMD) -0.49;  
38 95% CI -0.64 to -0.34;  $p<0.00001$ ;  $I^2=0\%$ ), increased sodium level (mean difference (MD) 1.56;  
39 95% CI 0.04 to 3.07;  $p=0.04$ ;  $I^2=0\%$ ).  
40

41 **Conclusion:** The result suggests that comparing with the standard diuretic therapy, Tolvaptan  
42 add-on therapy did not reduce the incidence of WRF and short-term mortality, however, it can  
43 decrease body weight and increase the sodium level in patients who are with ADHF. Further  
44 researches are still required for confirmation.  
45

46 Abbreviations: ADHF= Acute Decompensated Heart Failure, RCT= Randomized Controlled  
47 Trial, WRF= Worsening Renal Function, HF= Heart Failure, AVP= Arginine-vasopressin,  
48 CHF=Chronic Heart Failure, RAA =Renin-angiotensin-aldosterone  
49

50  
51  
52  
53  
54  
55  
56  
57  
58  
59  
60  
Keywords: Tolvaptan, Worsening Renal Function, Acute Decompensated Heart Failure,  
Meta-analysis

### Strengths and Limitations

Increased the Worsening Renal Function of tolvaptan in patients with acute decompensated heart failure.

Tolvaptan was not reducing the incidence of Worsening Renal Function or short-term all-cause mortality, however, it decreases the body weight while increases the sodium level.

Only 7 randomized controlled studies were included, however, some studies have limitations.

Lack of unified standards for the dosage, the tolvaptan use duration and follow-up time, which may affect the clinical outcomes.

Only English language studies included.

**Word Count:**2937words

### Introduction

Congestion is the primary reason for patients hospitalization with Acute Decompensated Heart Failure(ADHF). Despite in-patient use of diuretics and vasodilators targeting decongestion, congestion is persistent in many ADHF patients at hospital discharge and has been associated with increasing morbidity and mortality [1]. Currently, various types of therapeutic agents are used for heart failure (HF) as the standard treatment which includes diuretics, angiotensin-receptor blockers(ARB), angiotensin-converting enzymes inhibitors (ACE-I), and beta-blockers. These drugs are still playing an important role in the treatment of HF patients. Diuretics is the therapy cornerstone for the treatment of congestion, which is an important component of ADHF treatment for improving oxygenation and relieving the symptoms of edema, despite the potential adverse effects related to renin angiotensin aldosterone system activation, electrolyte disturbances, and worsening renal function [2].

Arginine-vasopressin (AVP) controls the body water content and blood pressure by affecting water excretion rate through kidney [3]. AVP is secreted from the posterior pituitary in response to elevation in plasma osmolality and the decreases in arterial pressure[4]. AVP causes water retention through the V<sub>2</sub> receptor to maintain the blood pressure. In patients with HF, contributing to such symptoms as edema, dyspnea, and congestion[5], the level of AVP in increased. The fatal disadvantages of loop diuretic treatment for patients with ADHF are activating neurohumoral factors and worsening renal function (WRF) [6]. WRF was defined as an increase in serum creatinine of 0.3 mg/dL from baseline within 7 days from admission. Tolvaptan is an orally active, non-peptide, selective V<sub>2</sub> receptor antagonist. Selective AVP V<sub>2</sub> receptor antagonists induce hypotonic diuresis without significantly influencing the excretion of electrolytes[7]. Tolvaptan has been mentioned in many studies. Tolvaptan benefits patients with symptomatic HF in reducing body weight, increasing urine volume and serum sodium, but without worsening renal function [8, 9]. Previous studies and meta-analysis have demonstrated that in ADHF patients, early administration of oral tolvaptan should be combined with standardize therapy, including conventional diuretics, improved heart failure signs and symptoms without serious events[10-13]. The purpose of this study is to conduct a meta-analysis of Random Controlled Trials (RCTs) focusing on the renal effects of tolvaptan in patients with ADHF in comparison with the effects of other traditional diuretic agents.

### METHODS

1  
2  
3 This meta-analysis was conducted in compliance with the Preferred Reporting Items for  
4 Systematic Reviews and Meta-Analysis (PRISMA) statement<sup>[14]</sup>.  
5

### 6 **Search Procedure**

7 We searched the MEDLINE, Embase and Cochrane Central Register of Controlled Trials  
8 databases from the date of their inception to October 31, 2017 with no language restrictions. We  
9 used the combinations of the terms like, 'Tolvaptan', 'vasopressin V2-receptor blocker', 'Acute  
10 Heart Failure', 'Acute Decompensated Heart Failure' as the test words and as MESH  
11 headings. The MEDLINE search strategy is available to view (see online supplementary appendix  
12 1). All articles were available till October 31, 2017. Relevant studies were identified from the  
13 reference lists of selected articles and review articles.  
14

### 15 **Study Selection**

16 Random controlled trials of tolvaptan add-on therapy comparing with traditional therapy or  
17 other diuresis agents in patients with evidence of ADHF were included with constraints on the  
18 time period till October 31, 2017. The processes of selection, data extraction, and quality  
19 assessment were independently executed by two reviewers. Disagreement was solved by  
20 reviewing the relevant studies for reach consensus.  
21

### 22 **Inclusion criteria**

23 The inclusion criteria for the studies are as follows: it should (1) be a random controlled trial  
24 (RCT); (2) include participants who are adult patients with ADHF and defined as patients had  
25 dyspnea at rest requiring urgent hospital admission for evaluation and treatment; (3) compare  
26 tolvaptan add-on therapy with traditional diuretics agents; and (4) include any relevant  
27 outcomes: all-cause mortality, WRF, sodium level, body weight reduction, and fluid loss.  
28

### 29 **Exclusion criteria**

30 The exclusion criteria are as follows: (1) observational study and (2) study on CHF or not  
31 reporting the desired outcome.  
32

### 33 **Data Extraction**

34 Data extraction from reports was processed in line with the protocol, by the reviewers;  
35 disagreements were resolved by negotiations. Attempts to contact all investigators were made  
36 to obtain raw data or to confirm details of the study design for all included trials. However, these  
37 attempts were not always successful as expected.  
38

39 For each of the trials included in the review, the following characteristics were recorded: (1)  
40 First author's surname; (2) Year of publication; (3) Country where the study was performed; (4)  
41 Study design and characteristics; (5) Total number of participants; (6) inclusion and exclusion  
42 criteria; (7) Details about intervention arm; (8) Details about traditional/control arm; (9) Dose of  
43 tolvaptan; (10) Treatment duration; (11) Primary outcome evaluated; (12) Other outcome  
44 variables evaluated; (13) Quality indicators.  
45

### 46 **Quality and risk of bias of included trials**

47 The quality of the included trials and the risk of bias were assessed by two independent  
48 reviewers using the components described by the Cochrane Collaboration <sup>[15]</sup>, including random  
49 sequence generation, allocation concealment, blinding of participants and personnel, blinding of  
50 outcome assessment, incomplete outcome data, selective reporting and other sources of bias.  
51 Disagreements were resolved by negotiation.  
52

### 53 **Statistical analysis**

54 All of the meta-analytic procedures were conducted by Review Manager, version 5.3.  
55  
56  
57  
58  
59  
60

1  
2  
3 Two-tailed p values < 0.05 were regarded as statistically significant. We used Q statistics, the  
4 related p values, and the I-square statistic to investigate the heterogeneity of each study.  
5 I-square statistic is a quantitative measure that describing the percentage of total variations due  
6 to heterogeneity. The extracted I-square statistic value was utilized to assess the heterogeneity  
7 of each variable across the study. According to the Cochrane Handbook<sup>[16]</sup>, heterogeneity of  
8 variables is indicating significant heterogeneity when the I-square range from 50% to 90%.  
9 Therefore, an I-square of < 50% is considered acceptable. If the research results were not  
10 statistically different, the fixed effect model would be used for meta-analysis. If there is a  
11 statistical heterogeneity among the research results, the sources of heterogeneity will be need  
12 further analysis. After excluding the obvious clinical heterogeneity, the random effects model  
13 was exploited in analyzing the Meta.  
14  
15

### 16 **Patient and public involvement**

17  
18  
19 No patients were directly involved in the development of the research question, selection of  
20 the outcome measures, design and implementation of the study, or interpretation of the results.  
21

### 22 **Achievements**

23 In total, 801 articles and documents were identified from the database research: 299 of  
24 PubMed, 421 of EMBASE, and 71 of the Cochrane Library. By screening titles and abstracts, 566  
25 apparently irrelevant articles were first excluded. Then, the detailed full texts of remainders  
26 were downloaded to assess. A full-text evaluation was performed and 21 of them were excluded  
27 for they are studies on: tolvaptan vs carperitide<sup>[17, 18]</sup> (n = 2), retrospective studies (n = 7), study  
28 articles<sup>[19-21]</sup> defined as one Randomized Controlled Study<sup>[20]</sup>. Finally, there are seven RCTs<sup>[12, 20,</sup>  
29 <sup>22-26]</sup> among nine articles included. The flow diagram of study selection is shown in figure 1.  
30  
31

### 32 **Study Characteristics and Quality**

33 The study characteristics of the seven RCTs from America, India, and Japan from 2012 to  
34 2017 with 937 patients involved are presented in Table 1. The duration of observations ranged  
35 from 2 to 636 days. Most participants<sup>[12, 20, 22-25]</sup> had ADHF [Left ventricular ejection fraction  
36 (LVEF) < 50%] of New York Heart Association (NYHA) class II-IV. One study focuses on the ADHF  
37 patients with HFpEF<sup>[26]</sup>. Three of the studies used Carperitide<sup>[20, 25, 26]</sup>. The risk of bias was  
38 evaluated with the Cochrane risk of bias tool<sup>[14]</sup>. Most items for all included RCTs showed with  
39 low risk; however, the information in some studies is still insufficient, which made the evaluation  
40 even more difficult. Generally speaking, the RCTs included in our meta-analysis are of relatively  
41 high quality, except one study by Matsue et al<sup>[20]</sup>, which shows a high risk of bias. The results are  
42 summarized in figure 2.  
43  
44  
45  
46  
47  
48  
49  
50  
51  
52  
53  
54  
55  
56  
57  
58  
59  
60

Table 1 Baseline characteristics of the studies included in meta-analysis

| Study<br>/year<br>/reference  | Study<br>Locat<br>ion | Sample<br>Size<br>Tolv<br>Con<br>n<br>1 | Intervention<br>Tolvapta<br>Control<br>Tolvapta<br>n<br>furosemid<br>e+<br>carperiti<br>+carperi<br>de<br>tide<br>tolvapta<br>n | LVEF,%<br>Tolvap<br>tan<br>1<br>Contro<br>l<br>Tolva<br>ptan<br>1 | Age, years<br>Contro<br>l<br>79±<br>11<br>79±11 | Follo<br>w-up<br>Durat<br>ion<br>5<br>days<br>48<br>hours<br>7days | Primary Outcome                                                                                                                     |
|-------------------------------|-----------------------|-----------------------------------------|---------------------------------------------------------------------------------------------------------------------------------|-------------------------------------------------------------------|-------------------------------------------------|--------------------------------------------------------------------|-------------------------------------------------------------------------------------------------------------------------------------|
| Jujo<br>2016 <sup>25</sup>    | Japan                 | 30                                      | 30<br>7.5mg/day<br>+carperide<br>tide<br>tolvapta<br>n                                                                          | 45 (33,<br>55)*                                                   | 46 (37,<br>60)*                                 | 79±11                                                              | 5 days<br>WRF, changes in urine<br>volume, serum creatinine;<br>BUN, BNP and catecholamines                                         |
| Tamaki<br>2017 <sup>26</sup>  | Japan                 | 26                                      | 24<br>7.5or15m<br>g/day +<br>diuretic                                                                                           | 60.7±<br>10.0                                                     | 59.7±<br>7.5                                    | 79±7                                                               | 48 hours<br>WRF, changes in serum<br>creatinine, BUN, body<br>weight, urine volume, serum<br>sodium and eGFR                        |
| Konstam<br>2017 <sup>22</sup> | Ameri<br>ca           | 122                                     | 128<br>n 30<br>mg/day+<br>diuretic                                                                                              | 35±16                                                             | 33±17                                           | 70±<br>11                                                          | 7days<br>WRF, changes in body<br>weight, dyspnea relief, eGFR and<br>serum creatinine ; 30-day<br>mortality or<br>rehospitalization |
| Felker<br>2017 <sup>23</sup>  | Ameri<br>ca           | 129                                     | 128<br>n 30<br>mg/day<br>+loop                                                                                                  | 34±17                                                             | 32±17                                           | 66±<br>13                                                          | 48h<br>WRF, changes in body<br>weight, serum sodium, dyspnea<br>relief and urine<br>volume;worsening HF                             |

|                                 |       |     |     | diuretic                                                                                                                                                                                       |                     |                     |                     |                     | and 30-day mortality                                                                                                                       |
|---------------------------------|-------|-----|-----|------------------------------------------------------------------------------------------------------------------------------------------------------------------------------------------------|---------------------|---------------------|---------------------|---------------------|--------------------------------------------------------------------------------------------------------------------------------------------|
| Shanmugam<br>2016 <sup>24</sup> | India | 25  | 26  | tolvapta<br>n<br>15mg/day diuretic<br>+<br>diuretic<br>tolvapta<br>n 15<br>mg/day conventio<br>+convent<br>ional<br>therapy<br>tolvapta<br>n<br>15mg/day furosemid<br>+<br>furosemi<br>de 20mg | 31.9±<br>12.2       | 29.2±<br>8.7        | 58.9<br>±12.1       | 57±12.5             | Changes in plasma sodium and<br>dyspnea relief ; adverse<br>effects                                                                        |
| Matsue<br>2016 <sup>20</sup>    | Japan | 108 | 109 | tolvapta<br>n 15<br>mg/day conventio<br>+convent<br>ional<br>therapy<br>tolvapta<br>n<br>15mg/day furosemid<br>+<br>furosemi<br>de 20mg                                                        | 45.4±<br>18.1       | 46.8±<br>16.4       | 72.99<br>±8.9       | 72.95<br>±<br>10.24 | 636<br>days<br>WRF;changes in body<br>weight,serum sodium, dyspnea<br>relief ,BNP and urine<br>volume;in-hospital<br>death;adverse effects |
| Kimura<br>2015 <sup>12</sup>    | Japan | 26  | 26  | tolvapta<br>n<br>15mg/day furosemid<br>+<br>furosemi<br>de 20mg                                                                                                                                | 47.54<br>±<br>16.75 | 56.73<br>±<br>11.52 | 80.54<br>±<br>12.15 | 86.15<br>±4.95      | 7days<br>WRF; changes in mean<br>creatinine clearance and<br>eGFR;Adverse effects.                                                         |

Data are given as the mean±standard deviation

\*Data presented as median with interquartile range.

WRF,worsening renal function;eGFR, estimated glomerular filtration rate; LVEF,left ventricular ejection fraction;

BNP,B-type natriuretic peptide ;BUN, blood urea nitrogen;HF,heart failure;

### Effect of Tolvaptan Add-on Therapy on WRF

Seven studies<sup>[12, 20, 22-26]</sup> have evaluated the effect of tolvaptan add-on therapy on WRF in patients with acute decompensated heart failure. Meta-analysis showed that  $I^2=66\%$ ,  $P=0.007$ , the heterogeneity was high, so a random effect model was used. Meta analysis (random effect model) showed that tolvaptan adding on loop diuretic comparing with controls or loop diuretic agents cannot significantly reduce the incidence of WRF (RR 0.78; 95% CI 0.48 to 1.26;  $p=0.31$ ) in Acute heart failure patients complicated with hyponatremia or renal dysfunction. As shown in figure 3. Sub-analysis on differences in WRF between low ( $\leq 15$  mg/day) and high ( $> 15$  mg/day) doses of tolvaptan. Low-dose group is in favor of add-on therapy compared to control (RR 0.48; 95% CI 0.23 to 1.02;  $p=0.05$ ;  $I^2=54\%$ ). High-dose group is not in favor of add-on therapy compared to control (RR 1.33; 95% CI 0.99 to 1.78;  $p=0.05$ ;  $I^2=0\%$ ). As shown in figure 3.

### Effects of Tolvaptan Add-on Therapy on Body Weight

Mean body weight reflected the aquaretic effect of tolvaptan add-on therapy in ADHF patients. Three studies<sup>[20, 22,23]</sup> were included in the meta-analysis of the changings in body weight from baseline to 48 hours . There was a significant difference between the tolvaptan add-on therapy and control arms in favor of tolvaptan add-on therapy , which is an standardized mean difference (SMD -0.49; 95% CI -0.64 to -0.34;  $p<0.00001$ ;  $I^2=0\%$ ) in body weight changing. As shown in figure 4.

### Effects of Tolvaptan Add-on Therapy on Short-term Mortality

Five studies<sup>[20, 22-25]</sup> described the effects of tolvaptan add-on therapy on all-cause mortality. The pooled effects of tolvaptan add-on therapy on mortality that included in those five trials were not significantly different from control (RR 0.85; 95% CI 0.47 to 1.56;  $p=0.61$ ;  $I^2=0\%$ ). As shown in figure 5.

### Effects of Tolvaptan Add-on Therapy on Serum Sodium

Although studies looked at changes of serum sodium at 5 days, there was a change in serum sodium in favor of tolvaptan add-on therapy (mean difference (MD) 1.56; 95% CI 0.04 to 3.07;  $p=0.04$ ;  $I^2=0\%$ ). As shown in figure 6.

### Discussion

The main findings of this meta-analysis indicate that tolvaptan add-on therapy does not ameliorate the incidence of WRF or the short-term all-cause mortality in patients with ADHF. However, tolvaptan add-on therapy can reduce body weight, and increase the sodium level in patients with ADHF. A great majority of ADHF admissions are related to volume overload and congestion while loop diuretics decongestion remains the mainstay of current ADHF therapy. It was suggested that that WRF can be caused by immediate intravascular volume reduction induced by decongestion therapy using loop diuretics. WRF may through activation of the renin-angiotensin-aldosterone (RAA) and sympathetic nervous systems, and then leading to a decrease in renal perfusion and glomerular filtration pressure<sup>[27]</sup>. Renal dysfunction is also a common comorbidity in ADHF patients, and it forebodes higher rates of mortality and hospitalization in patients with ADHF to a great extent<sup>[28]</sup>.

There is an urgent need for an alternative approach to achieve adequate decongestion with minimum risk of WRF in ADHF patients<sup>[29]</sup>. Tolvaptan has been alleviating congestion without a reducing the renal blood flow or activation of the RAA and sympathetic nervous systems<sup>[5]</sup>. The prognosis of HF patients<sup>[30]</sup> can be greatly improve by the renal protective treatment. However, in this analysis, WRF has no statistical significance; the mean body weight has decreased and

1  
2  
3 sodium concentration has increased.

4 Sub-analysis of studies with low dose, tolvaptan add-on therapy may decreased the rate of  
5 WRF. The results indicate that the use of tolvaptan add-on therapy in AHF may reduce WRF  
6 compared with the increasing loop diuretics. The improvement of kidney function may be  
7 attributed to the dose reduction of loop diuretics, which is facilitated through the aquaresis by  
8 tolvaptan. Consistent with that low-dose tolvaptan add-on therapy in HF patients with diuretic  
9 resistance and renal impairment increased urine volume without further renal impairment  
10 compared with patients who received an increased dose of furosemide<sup>[31]</sup>. The high-dose group  
11 consisted of America studies (placebo-controlled studies) may cause the increasing the rate of  
12 WRF. In this analysis, although tolvaptan has no effect on WRF, while in the subgroup of  
13 low-dose tolvaptan group decreased the rate of WRF. The result indicates that high-dose (30mg)  
14 tolvaptan in AHF may increase WRF compared with low-dose tolvaptan. The dose of tolvaptan  
15 may be related to the incidence of WRF. This result should be carefully interpreted, however,  
16 because the limitaion of present data( $p=0.05$ ), so more well-designed randomized clinical trials  
17 are needed.  
18  
19  
20  
21  
22

23 Aggressive fluid removal therapy is strongly recommended for symptom relieving and  
24 hemodynamic improvement in ADHF . Tolvaptan add-on therapy csn significantly reduce body  
25 weight , however, it cannot ameliorate the incidence of WRF and short-term all-cause mortality.  
26 Tolvaptan may like ultrafiltration acting as a decongestion method .Therefore, rapid and  
27 aggressive decongestion treatment may precede WRF for ameliorate congestion during  
28 hospitalization, irrespective of the decongestion method. In the Ultrafiltration vs. Intravenous  
29 Diuretics for Patients Hospitalized for Acute Decompensated Congestive Heart Failure (UNLOAD)  
30 trial, greater weight loss and a trend toward WRF by ultrafiltration compared with conventional  
31 diuretic therapy were associated with a reduced rate of rehospitalization for HF<sup>[32]</sup>. The  
32 short-term of therapy may have been one factor for the failure in achieving long-term effects,  
33 although other short-term interventions can at times have long-term effects.  
34  
35  
36

37 The present overall results are, in part, consistent with previous meta-analyses of tolvaptan  
38 in acute heart failure<sup>[13]</sup>. The current analysis exclude the trials comparing to tolvaptan and  
39 carperitide <sup>[17, 18]</sup> and include a placebo-controlled study from America<sup>[22]</sup> and a controlled study  
40 from Japan<sup>[26]</sup> . Regarding to the subgroup analysis of WRF in ADHF patients, low-dose tolvaptan  
41 may decrease the rate of WRF.  
42  
43

#### 44 **Limitations**

45 There are a number of limitations in the meta-analysis. Firstly, a total of 7 random  
46 controlled studies were included, but most of the studies have their limitations. The inclusions of  
47 the study were more concentrated in the same region and country. Although the studies were  
48 randomized controlled trials, but the study of the distribution are hidden, the specific random  
49 method is not a completed description, there is no solid evidence to regulate the possibility of  
50 patient selection bias. Only two studies from the selected trials measured long-term mortality  
51 and four studies had the outcomes of short-term mortality. Secondly, there is no unified  
52 standard for the dosage, the tolvaptan use duration and follow-up time, which may affect the  
53 clinical outcomes. Thirdly, differences in race, age, and complication among studies also may  
54 result in slightly diverse response to therapy. Fourthly, different control treatments may also  
55 lead to the inaccurate results. In addition, the sample size of some RCTs was too small and the  
56 adverse effects of tolvaptan such as dry mouth, dehydration were not reported in some study.  
57  
58  
59  
60



Therefore, this meta-analysis also has certain enlightenment to the future randomized controlled trial: (1) Unified drug administration time and dosage; (2) The articles included in the study should come from different countries and regions in order to clarify the clinical effect of different countries and nationalities for an accurate conclusion.

### Conclusion

We observed that tolvaptan add-on therapy does not ameliorate incidence of WRF, short-term all-cause mortality in patients with ADHF. However, tolvaptan add-on therapy can reduce body weight, elevate sodium level in patients with ADHF. Due to the limitations of the quality and quantity of the articles and documents, further researches for this conclusion are needed.

### All Authors Affix

Department of Cardiology, The First Affiliated Hospital of Henan University, Kaifeng, Henan, China,

**Contributors:** Guang Ma is the guarantor. Guang Ma drafted the manuscript. All the authors contributed to the development of the selection criteria, the risk of bias assessment strategy and data extraction criteria, the search strategy and statistical expertise. All the authors read, provided feedback and approved the final manuscript. Guang Ma and Xixi Ma conceived and designed the experiments. Guang Ma, Xixi Ma and Guoliang Wang performed the experiments. Guang Ma and Wei Teng analysed the data. Guang Ma and Xuezhi Hui contributed reagents/materials/analysis tools. Guang Ma wrote the paper.

**Funding** This research received no specific sponsorship or grant from any funding agency in the public, commercial or non-profit sectors.

**Competing interests:** None declared.

**Patient consent:** Obtained.

**Ethics approval:** Ethical approval was not applicable for this meta-analysis.

**Provenance and peer review** :Not commissioned; externally peer reviewed.

**Data sharing statement:** No additional data are available.

### Reference

1. Ambrosy AP, Pang PS, Khan S, et al. Clinical course and predictive value of congestion during hospitalization in patients admitted for worsening signs and symptoms of heart failure with reduced ejection fraction: findings from the EVEREST trial. *European heart journal* 2013;**34**(11):835-43 doi: 10.1093/eurheartj/ehs444[published Online First: Epub Date]].
2. Hardin EA, Grodin JL. Diuretic Strategies in Acute Decompensated Heart Failure. *Current heart failure reports* 2017;**14**(2):127-33 doi: 10.1007/s11897-017-0319-y[published Online First: Epub Date]].
3. Ishikawa SE, Saito T, Saito T, Kasono K, Funayama H. Pathophysiological role of aquaporin-2 in impaired water excretion. *Progress in brain research* 2008;**170**:581-8 doi: 10.1016/s0079-6123(08)00445-7[published Online First: Epub Date]].
4. Lee CR, Watkins ML, Patterson JH, et al. Vasopressin: a new target for the treatment of heart failure. *American heart journal* 2003;**146**(1):9-18 doi: 10.1016/s0002-8703(02)94708-3[published

- Online First: Epub Date]].
5. Costello-Boerrigter LC, Smith WB, Boerrigter G, et al. Vasopressin-2-receptor antagonism augments water excretion without changes in renal hemodynamics or sodium and potassium excretion in human heart failure. *American journal of physiology. Renal physiology* 2006;**290**(2):F273-8 doi: 10.1152/ajprenal.00195.2005[published Online First: Epub Date]].
  6. Salah K, Kok WE, Eurlings LW, et al. Competing Risk of Cardiac Status and Renal Function During Hospitalization for Acute Decompensated Heart Failure. *JACC. Heart failure* 2015;**3**(10):751-61 doi: 10.1016/j.jchf.2015.05.009[published Online First: Epub Date]].
  7. Izumi Y, Miura K, Iwao H. Therapeutic Potential of Vasopressin-Receptor Antagonists in Heart Failure. *Journal of Pharmacological Sciences* 2014;**124**(1):1-6 doi: 10.1254/jphs.13R13CP[published Online First: Epub Date]].
  8. Alskaf E, Tridente A, Al-Mohammad A. Tolvaptan for Heart Failure, Systematic Review and Meta-Analysis of Trials. *Journal of cardiovascular pharmacology* 2016;**68**(3):196-203 doi: 10.1097/fjc.0000000000000405[published Online First: Epub Date]].
  9. Wu MY, Chen TT, Chen YC, et al. Effects and safety of oral tolvaptan in patients with congestive heart failure: A systematic review and network meta-analysis. *PloS one* 2017;**12**(9):e0184380 doi: 10.1371/journal.pone.0184380[published Online First: Epub Date]].
  10. Konstam MA, Gheorghiade M, Burnett JC, Jr., et al. Effects of oral tolvaptan in patients hospitalized for worsening heart failure: the EVEREST Outcome Trial. *Jama* 2007;**297**(12):1319-31 doi: 10.1001/jama.297.12.1319[published Online First: Epub Date]].
  11. Gheorghiade M, Konstam MA, Burnett JC, Jr., et al. Short-term clinical effects of tolvaptan, an oral vasopressin antagonist, in patients hospitalized for heart failure: the EVEREST Clinical Status Trials. *Jama* 2007;**297**(12):1332-43 doi: 10.1001/jama.297.12.1332[published Online First: Epub Date]].
  12. Kimura K, Momose T, Hasegawa T, et al. Early administration of tolvaptan preserves renal function in elderly patients with acute decompensated heart failure. *Journal of cardiology* 2016;**67**(5):399-405 doi: 10.1016/j.jjcc.2015.09.020[published Online First: Epub Date]].
  13. Wang C, Xiong B, Cai L. Effects of Tolvaptan in patients with acute heart failure: a systematic review and meta-analysis. *BMC cardiovascular disorders* 2017;**17**(1):164 doi: 10.1186/s12872-017-0598-y[published Online First: Epub Date]].
  14. Liberati A, Altman DG, Tetzlaff J, et al. The PRISMA statement for reporting systematic reviews and meta-analyses of studies that evaluate health care interventions: explanation and elaboration. *Annals of internal medicine* 2009;**151**(4):W65-94
  15. Higgins JP, Altman DG, Gotzsche PC, et al. The Cochrane Collaboration's tool for assessing risk of bias in randomised trials. *BMJ (Clinical research ed.)* 2011;**343**:d5928 doi: 10.1136/bmj.d5928[published Online First: Epub Date]].
  16. Deeks JJ, Higgins JPT, Altman DG (editors). Chapter 9: Analysing data and undertaking Meta-analyses. In: Higgins JPT, Green S (editors). *Cochrane Handbook for Systematic Reviews of Interventions*. Version 5.1.0 [updated March 2011]. The Cochrane Collaboration, 2011. Available from [www.cochrane-handbook.org](http://www.cochrane-handbook.org).
  17. Suzuki S, Yoshihisa A, Yamaki T, et al. Acute heart failure volume control multicenter randomized (AVCMA) trial: comparison of tolvaptan and carperitide. *Journal of clinical pharmacology* 2013;**53**(12):1277-85 doi: 10.1002/jcph.197[published Online First: Epub Date]].
  18. Suzuki S, Yoshihisa A, Yamaki T, et al. Long-term effects and prognosis in acute heart failure

- 1  
2  
3 treated with tolvaptan: the AVCMA trial. *BioMed research international* 2014;**2014**:704289  
4 doi: 10.1155/2014/704289[published Online First: Epub Date]].
- 5  
6 19. Matsue Y, Suzuki M, Nagahori W, et al. Clinical effectiveness of tolvaptan in patients with acute  
7 decompensated heart failure and renal failure: design and rationale of the AQUAMARINE  
8 study. *Cardiovascular drugs and therapy* 2014;**28**(1):73-7 doi:  
9 10.1007/s10557-013-6491-8[published Online First: Epub Date]].
- 10  
11 20. Matsue Y, Suzuki M, Torii S, et al. Clinical Effectiveness of Tolvaptan in Patients With Acute Heart  
12 Failure and Renal Dysfunction. *Journal of cardiac failure* 2016;**22**(6):423-32 doi:  
13 10.1016/j.cardfail.2016.02.007[published Online First: Epub Date]].
- 14  
15 21. Matsue Y, Suzuki M, Torii S, et al. Prognostic impact of early treatment with tolvaptan in patients  
16 with acute heart failure and renal dysfunction. *International journal of cardiology*  
17 2016;**221**:188-93 doi: 10.1016/j.ijcard.2016.07.063[published Online First: Epub Date]].
- 18  
19 22. Konstam MA, Kiernan M, Chandler A, et al. Short-Term Effects of Tolvaptan in Patients With Acute  
20 Heart Failure and Volume Overload. *Journal of the American College of Cardiology*  
21 2017;**69**(11):1409-19 doi: 10.1016/j.jacc.2016.12.035[published Online First: Epub Date]].
- 22  
23 23. Felker GM, Mentz RJ, Cole RT, et al. Efficacy and Safety of Tolvaptan in Patients Hospitalized With  
24 Acute Heart Failure. *Journal of the American College of Cardiology* 2017;**69**(11):1399-406 doi:  
25 10.1016/j.jacc.2016.09.004[published Online First: Epub Date]].
- 26  
27 24. Shanmugam E, Doss CR, George M, et al. Effect of tolvaptan on acute heart failure with  
28 hyponatremia--a randomized, double blind, controlled clinical trial. *Indian heart journal*  
29 2016;**68 Suppl 1**:S15-21 doi: 10.1016/j.ihj.2015.07.006[published Online First: Epub Date]].
- 30  
31 25. Jujo K, Saito K, Ishida I, et al. Randomized pilot trial comparing tolvaptan with furosemide on renal  
32 and neurohumoral effects in acute heart failure. *ESC heart failure* 2016;**3**(3):177-88 doi:  
33 10.1002/ehf2.12088[published Online First: Epub Date]].
- 34  
35 26. Tamaki S, Sato Y, Yamada T, et al. Tolvaptan Reduces the Risk of Worsening Renal Function in  
36 Patients With Acute Decompensated Heart Failure and Preserved Left Ventricular Ejection  
37 Fraction- Prospective Randomized Controlled Study. *Circulation journal : official journal of*  
38 *the Japanese Circulation Society* 2017;**81**(5):740-47 doi: 10.1253/circj.CJ-16-1122[published  
39 Online First: Epub Date]].
- 40  
41 27. Ronco C, Cicoira M, McCullough PA. Cardiorenal syndrome type 1: pathophysiological crosstalk  
42 leading to combined heart and kidney dysfunction in the setting of acutely decompensated  
43 heart failure. *Journal of the American College of Cardiology* 2012;**60**(12):1031-42 doi:  
44 10.1016/j.jacc.2012.01.077[published Online First: Epub Date]].
- 45  
46 28. Metra M, Cotter G, Senger S, et al. Prognostic Significance of Creatinine Increases During an Acute  
47 Heart Failure Admission in Patients With and Without Residual Congestion: A Post Hoc  
48 Analysis of the PROTECT Data. *Circulation. Heart failure* 2018;**11**(5):e004644 doi:  
49 10.1161/circheartfailure.117.004644[published Online First: Epub Date]].
- 50  
51 29. Goldsmith SR, Bart BA, Burnett J. Decongestive therapy and renal function in acute heart failure:  
52 time for a new approach? *Circulation. Heart failure* 2014;**7**(3):531-5 doi:  
53 10.1161/circheartfailure.113.000828[published Online First: Epub Date]].
- 54  
55 30. Damman K, Valente MA, Voors AA, O'Connor CM, van Veldhuisen DJ, Hillege HL. Renal impairment,  
56 worsening renal function, and outcome in patients with heart failure: an updated  
57 meta-analysis. *European heart journal* 2014;**35**(7):455-69 doi:  
58 10.1093/eurheartj/eh386[published Online First: Epub Date]].  
59  
60

- 1  
2  
3  
4  
5  
6  
7  
8  
9  
10  
11  
12  
13  
14  
15  
16  
17  
18  
19  
20  
21  
22
31. Inomata T, Ikeda Y, Kida K, et al. Effects of Additive Tolvaptan vs. Increased Furosemide on Heart Failure With Diuretic Resistance and Renal Impairment — Results From the K-STAR Study — . *Circulation Journal* 2018;**82**(1):159-67 doi: 10.1253/circj.CJ-17-0179[published Online First: Epub Date]].
32. Costanzo MR, Guglin ME, Saltzberg MT, et al. Ultrafiltration versus intravenous diuretics for patients hospitalized for acute decompensated heart failure. *Journal of the American College of Cardiology* 2007;**49**(6):675-83 doi: 10.1016/j.jacc.2006.07.073[published Online First: Epub Date]].

23 Figure.1 Flow diagram of study selection

24 Figure 2 Risk of bias summary

25 Figure 3 Forest plot depicting the effect of tolvaptan on worsening renal function versus  
26 control

27 Figure 4 Forest plot depicting the effect of tolvaptan on body weight reductions versus  
28 control

29 Figure 5 Forest plot depicting the effect of tolvaptan on mortality versus control

30 Figure 6 Forest plot depicting the effect of tolvaptan on Serum Sodium versus control

31  
32  
33  
34  
35  
36  
37  
38  
39  
40  
41  
42  
43  
44  
45  
46  
47  
48  
49  
50  
51  
52  
53  
54  
55  
56  
57  
58  
59  
60

Figure.1 Flow diagram of study selection



Six-hundred ninety-one articles were identified from the database research: 299 of PubMed, 421 of EMBASE, and 71 of the Cochrane Library. After screening the titles and abstracts, 30 studies eligible for full text screening were identified. A full-text evaluation was performed and 21 were excluded for the following reasons: study about tolvaptan vs carperitide (n = 2), retrospective study (n = 7), study performed on CHF or HF patients (n = 4), failure to report required endpoints (n = 8). Finally, seven RCTs among nine articles were included.

F

Figure.1

193x267mm (300 x 300 DPI)

|                | Random sequence generation (selection bias) | Allocation concealment (selection bias) | Blinding of participants and personnel (performance bias) | Blinding of outcome assessment (detection bias) | Incomplete outcome data (attrition bias) | Selective reporting (reporting bias) | Other bias |
|----------------|---------------------------------------------|-----------------------------------------|-----------------------------------------------------------|-------------------------------------------------|------------------------------------------|--------------------------------------|------------|
| Felker 2017    | ?                                           | +                                       | +                                                         | +                                               | +                                        | +                                    | +          |
| Jujo 2016      | -                                           | +                                       | -                                                         | -                                               | +                                        | +                                    | +          |
| Kimura 2015    | ?                                           | +                                       | -                                                         | ?                                               | +                                        | +                                    | +          |
| Konstam 2017   | +                                           | +                                       | +                                                         | +                                               | +                                        | +                                    | +          |
| Matsue 2016    | -                                           | -                                       | -                                                         | ?                                               | +                                        | +                                    | +          |
| Shanmugam 2016 | ?                                           | ?                                       | +                                                         | +                                               | +                                        | +                                    | +          |
| Tamaki 2017    | +                                           | +                                       | ?                                                         | +                                               | +                                        | +                                    | +          |

Figure 2

162x264mm (300 x 300 DPI)

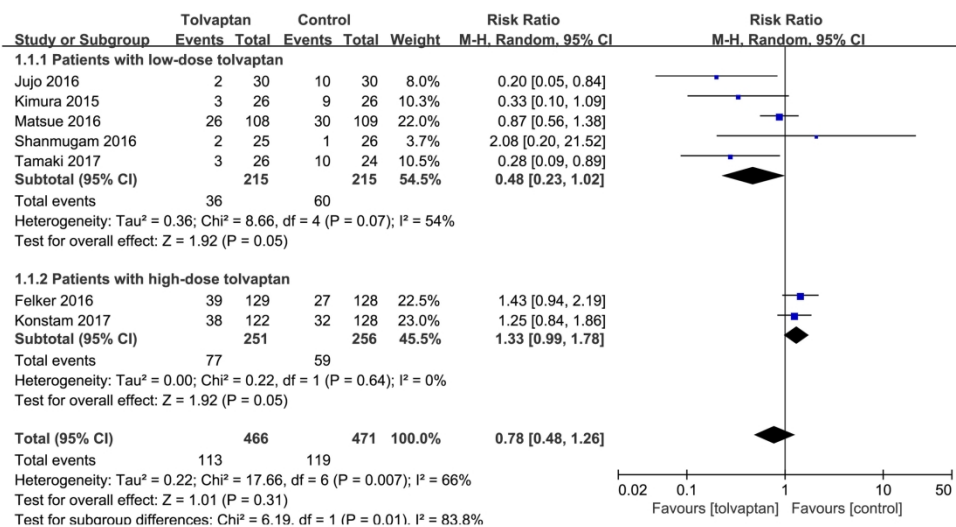

Figure 3

203x114mm (300 x 300 DPI)

1  
2  
3  
4  
5  
6  
7  
8  
9  
10  
11  
12  
13  
14  
15  
16  
17  
18  
19  
20  
21  
22  
23  
24  
25  
26  
27  
28  
29  
30  
31  
32  
33  
34  
35  
36  
37  
38  
39  
40  
41  
42  
43  
44  
45  
46  
47  
48  
49  
50  
51  
52  
53  
54  
55  
56  
57  
58  
59  
60

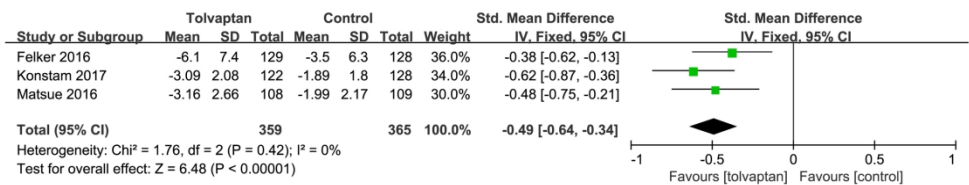

Figure 4

203x45mm (300 x 300 DPI)



1  
2  
3  
4  
5  
6  
7  
8  
9  
10  
11  
12  
13  
14  
15  
16  
17  
18  
19  
20  
21  
22  
23  
24  
25  
26  
27  
28  
29  
30  
31  
32  
33  
34  
35  
36  
37  
38  
39  
40  
41  
42  
43  
44  
45  
46  
47  
48  
49  
50  
51  
52  
53  
54  
55  
56  
57  
58  
59  
60

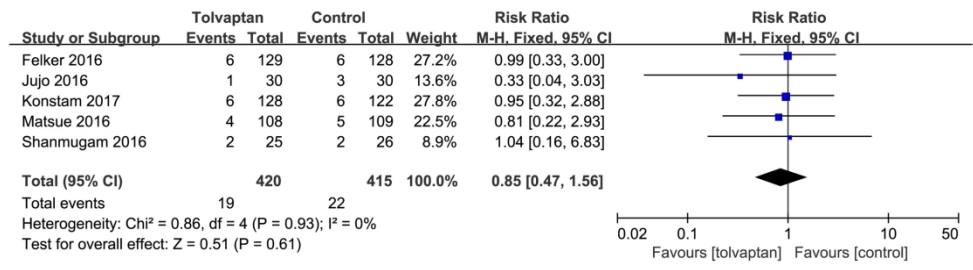

Figure 5

203x60mm (300 x 300 DPI)

1  
2  
3  
4  
5  
6  
7  
8  
9  
10  
11  
12  
13  
14  
15  
16  
17  
18  
19  
20  
21  
22  
23  
24  
25  
26  
27  
28  
29  
30  
31  
32  
33  
34  
35  
36  
37  
38  
39  
40  
41  
42  
43  
44  
45  
46  
47  
48  
49  
50  
51  
52  
53  
54  
55  
56  
57  
58  
59  
60

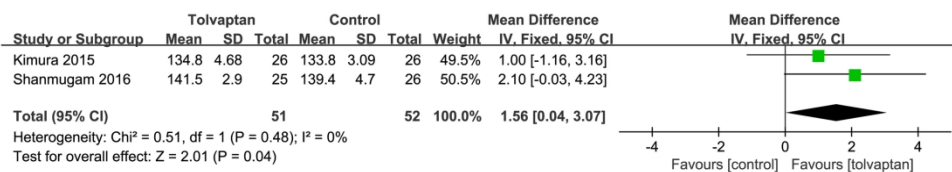

Figure 6

203x41mm (300 x 300 DPI)

**Supplementary Appendix 1****Search Strategy in MEDLINE**

1. acute decompensated heart failure [key word]
2. acute heart failure [key word]
3. acute[All Fields]
4. decompensated[All Fields]
5. "heart failure"[MeSH Terms]
6. "heart"[All Fields] and "failure"[All Fields]
7. "heart failure"[All Fields]
8. "tolvaptan"[Supplementary Concept]
9. "tolvaptan"[All Fields]
10. tolvaptan [key word]
11. "receptors, vasopressin"[MeSH Terms]
12. "receptors"[All Fields] and "vasopressin"[All Fields]
13. "vasopressin receptors"[All Fields]
14. ("vasopressin"[All Fields] and "v2"[All Fields] and "receptor"[All Fields])
15. Blocker[All Fields]
16. (1 or 2) and 10
17. 3 and 4 and ( 5 or 6 or 7 ) and ( 8 or 9 or 10)
18. ( 11 or 12 or 13 or 14 )and 15
19. 16 or 17 or 18

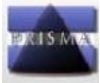

# PRISMA 2009 Checklist

1  
2  
3  
4  
5  
6  
7  
8  
9  
10  
11  
12  
13  
14  
15  
16  
17  
18  
19  
20  
21  
22  
23  
24  
25  
26  
27  
28  
29  
30  
31  
32  
33  
34  
35  
36  
37  
38  
39  
40  
41  
42  
43  
44  
45  
46  
47

| Section/topic                      | #  | Checklist item                                                                                                                                                                                                                                                                                              | Reported on page # |
|------------------------------------|----|-------------------------------------------------------------------------------------------------------------------------------------------------------------------------------------------------------------------------------------------------------------------------------------------------------------|--------------------|
| <b>TITLE</b>                       |    |                                                                                                                                                                                                                                                                                                             |                    |
| Title                              | 1  | Identify the report as a systematic review, meta-analysis, or both.                                                                                                                                                                                                                                         | 1                  |
| <b>ABSTRACT</b>                    |    |                                                                                                                                                                                                                                                                                                             |                    |
| Structured summary                 | 2  | Provide a structured summary including, as applicable: background; objectives; data sources; study eligibility criteria, participants, and interventions; study appraisal and synthesis methods; results; limitations; conclusions and implications of key findings; systematic review registration number. | 1                  |
| <b>INTRODUCTION</b>                |    |                                                                                                                                                                                                                                                                                                             |                    |
| Rationale                          | 3  | Describe the rationale for the review in the context of what is already known.                                                                                                                                                                                                                              | 2                  |
| Objectives                         | 4  | Provide an explicit statement of questions being addressed with reference to participants, interventions, comparisons, outcomes, and study design (PICOS).                                                                                                                                                  | 2                  |
| <b>METHODS</b>                     |    |                                                                                                                                                                                                                                                                                                             |                    |
| Protocol and registration          | 5  | Indicate if a review protocol exists, if and where it can be accessed (e.g., Web address), and, if available, provide registration information including registration number.                                                                                                                               | 3                  |
| Eligibility criteria               | 6  | Specify study characteristics (e.g., PICOS, length of follow-up) and report characteristics (e.g., years considered, language, publication status) used as criteria for eligibility, giving rationale.                                                                                                      | 3                  |
| Information sources                | 7  | Describe all information sources (e.g., databases with dates of coverage, contact with study authors to identify additional studies) in the search and date last searched.                                                                                                                                  | 3                  |
| Search                             | 8  | Present full electronic search strategy for at least one database, including any limits used, such that it could be repeated.                                                                                                                                                                               | 3                  |
| Study selection                    | 9  | State the process for selecting studies (i.e., screening, eligibility, included in systematic review, and, if applicable, included in the meta-analysis).                                                                                                                                                   | 3                  |
| Data collection process            | 10 | Describe method of data extraction from reports (e.g., piloted forms, independently, in duplicate) and any processes for obtaining and confirming data from investigators.                                                                                                                                  | 3                  |
| Data items                         | 11 | List and define all variables for which data were sought (e.g., PICOS, funding sources) and any assumptions and simplifications made.                                                                                                                                                                       | 3                  |
| Risk of bias in individual studies | 12 | Describe methods used for assessing risk of bias of individual studies (including specification of whether this was done at the study or outcome level), and how this information is to be used in any data synthesis.                                                                                      | 3                  |
| Summary measures                   | 13 | State the principal summary measures (e.g., risk ratio, difference in means).                                                                                                                                                                                                                               | 3                  |
| Synthesis of results               | 14 | Describe the methods of handling data and combining results of studies, if done, including measures of consistency (e.g., $I^2$ ) for each meta-analysis.                                                                                                                                                   | 3,4                |

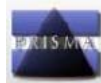

# PRISMA 2009 Checklist

Page 1 of 2

| Section/topic                 | #  | Checklist item                                                                                                                                                                                           | Reported on page # |
|-------------------------------|----|----------------------------------------------------------------------------------------------------------------------------------------------------------------------------------------------------------|--------------------|
| Risk of bias across studies   | 15 | Specify any assessment of risk of bias that may affect the cumulative evidence (e.g., publication bias, selective reporting within studies).                                                             | 4                  |
| Additional analyses           | 16 | Describe methods of additional analyses (e.g., sensitivity or subgroup analyses, meta-regression), if done, indicating which were pre-specified.                                                         | 3,4                |
| <b>RESULTS</b>                |    |                                                                                                                                                                                                          |                    |
| Study selection               | 17 | Give numbers of studies screened, assessed for eligibility, and included in the review, with reasons for exclusions at each stage, ideally with a flow diagram.                                          | 4                  |
| Study characteristics         | 18 | For each study, present characteristics for which data were extracted (e.g., study size, PICOS, follow-up period) and provide the citations.                                                             | 4-6                |
| Risk of bias within studies   | 19 | Present data on risk of bias of each study and, if available, any outcome level assessment (see item 12).                                                                                                | 4                  |
| Results of individual studies | 20 | For all outcomes considered (benefits or harms), present, for each study: (a) simple summary data for each intervention group (b) effect estimates and confidence intervals, ideally with a forest plot. | 4                  |
| Synthesis of results          | 21 | Present results of each meta-analysis done, including confidence intervals and measures of consistency.                                                                                                  | 7                  |
| Risk of bias across studies   | 22 | Present results of any assessment of risk of bias across studies (see Item 15).                                                                                                                          |                    |
| Additional analysis           | 23 | Give results of additional analyses, if done (e.g., sensitivity or subgroup analyses, meta-regression [see Item 16]).                                                                                    | 7                  |
| <b>DISCUSSION</b>             |    |                                                                                                                                                                                                          |                    |
| Summary of evidence           | 24 | Summarize the main findings including the strength of evidence for each main outcome; consider their relevance to key groups (e.g., healthcare providers, users, and policy makers).                     | 7,8                |
| Limitations                   | 25 | Discuss limitations at study and outcome level (e.g., risk of bias), and at review-level (e.g., incomplete retrieval of identified research, reporting bias).                                            | 8,9                |
| Conclusions                   | 26 | Provide a general interpretation of the results in the context of other evidence, and implications for future research.                                                                                  | 9                  |
| <b>FUNDING</b>                |    |                                                                                                                                                                                                          |                    |
| Funding                       | 27 | Describe sources of funding for the systematic review and other support (e.g., supply of data); role of funders for the systematic review.                                                               | 9                  |

From: Moher D, Liberati A, Tetzlaff J, Altman DG, The PRISMA Group (2009). Preferred Reporting Items for Systematic Reviews and Meta-Analyses: The PRISMA Statement. PLoS Med 6(7): e1000097. doi:10.1371/journal.pmed1000097

For more information, visit: [www.prisma-statement.org](http://www.prisma-statement.org).

Page 2 of 2

For peer review only - <http://bmjopen.bmj.com/site/about/guidelines.xhtml>
